# Supplementary material for: Development and application of observable response indicators for design of an effective ozone and fine particle pollution control strategy in China
Source: Copernicus journal article supplement (doi:10.5194/acp-2019-183), 2019-05-22
Supplement: Supplementary file [file acp-2019-183-AC2-supplement.pdf]

# 1 Development and application of observable response indicators for design of 2 an effective ozone and fine particle pollution control strategy in China

3 Jia Xing<sup>1,2</sup>, Dian Ding<sup>1,2</sup>, Shuxiao Wang<sup>1,2,\*</sup>, Zhaoxin Dong<sup>1,2</sup>, James T. Kelly<sup>3</sup>, Carey Jang<sup>3</sup>, Yun Zhu<sup>4</sup>, Jiming Hao<sup>1,2</sup>

4 <sup>1</sup> State Key Joint Laboratory of Environmental Simulation and Pollution Control, School of Environment,  
5 Tsinghua University, Beijing 100084, China

6 <sup>2</sup> State Environmental Protection Key Laboratory of Sources and Control of Air Pollution Complex, Beijing  
7 100084, China

8 <sup>3</sup> Office of Air Quality Planning and Standards, U.S. Environmental Protection Agency, Research Triangle Park,  
9 NC 27711, USA

10 <sup>4</sup> College of Environmental Science & Engineering, South China University of Technology, Guangzhou Higher  
11 Education Mega Center, Guangzhou, China

12

13 \*Corresponding Author: Shuxiao Wang (email: shxwang@tsinghua.edu.cn; phone: +86-10-62771466; fax: +86-  
14 10-62773650)

15

## 16 **Abstract**

17 Designing effective control policies requires efficient quantification of the nonlinear response of air  
18 pollution to emissions. However, neither the current observable indicators nor the current indicators based  
19 on response-surface modeling (RSM) can fulfill this requirement. Therefore, this study developed new  
20 observable RSM-based indicators and applied them to ambient fine **particle** (PM<sub>2.5</sub>) and ozone (O<sub>3</sub>)  
21 pollution control in China. The performance of these observable indicators in predicting O<sub>3</sub> and PM<sub>2.5</sub>  
22 chemistry was compared with that of the current RSM-based indicators. H<sub>2</sub>O<sub>2</sub>×HCHO/NO<sub>2</sub> and total  
23 ammonia ratio, which exhibited the best performance among indicators, were proposed as new observable  
24 O<sub>3</sub>- and PM<sub>2.5</sub>-chemistry indicators, respectively. Strong correlations between RSM-based and traditional  
25 observable indicators suggested that a combination of ambient concentrations of certain chemical species  
26 can serve as an indicator to approximately quantify the response of O<sub>3</sub> and PM<sub>2.5</sub> to changes in precursor

27 emissions. The observable RSM-based indicator for O<sub>3</sub> (observable peak ratio) effectively captured the  
28 strong NO<sub>x</sub>-saturated regime in January and the NO<sub>x</sub>-limited regime in July, as well as the strong NO<sub>x</sub>-  
29 saturated regime in northern and eastern China and their key regions, including the Yangtze River Delta  
30 and Pearl River Delta. The observable RSM-based indicator for PM<sub>2.5</sub> (observable flex ratio) also captured  
31 strong NH<sub>3</sub>-poor condition in January and NH<sub>3</sub>-rich condition in April and July, as well as NH<sub>3</sub>-rich in  
32 northern and eastern China and the Sichuan Basin. Moreover, analysis of these newly developed  
33 observable response indicators suggested that the simultaneous control of NH<sub>3</sub> and NO<sub>x</sub> emissions  
34 produces greater benefits in provinces with higher PM<sub>2.5</sub> exposure by up to 12 μg m<sup>-3</sup> PM<sub>2.5</sub> per 10 % NH<sub>3</sub>  
35 reduction compared with NO<sub>x</sub> control only. Control of volatile organic compound (VOC) emissions by as  
36 much as 40 % of NO<sub>x</sub> controls is necessary to obtain the co-benefits of reducing both O<sub>3</sub> and PM<sub>2.5</sub>  
37 exposure at the national level when controlling NO<sub>x</sub> emissions. However, the VOC-to-NO<sub>x</sub> ratio required  
38 to maintain benefits varies significantly from 0 to 1.2 in different provinces, suggesting that a more  
39 localized control strategy should be designed for each province.

40

41 **Keywords:** nonlinear response, precursor emissions, response surface model, ozone, PM<sub>2.5</sub>, indicator

42

## 43 **1. Introduction**

44 Air pollution has attracted great attention because of its harmful effects on human health (Cohen et  
45 al., 2017), climate (Myhre et al., 2013), agriculture and ecosystems (Fuhrer et al., 2016), and visibility  
46 (Friedlander et al., 1977). In particular, ambient fine **particles** (PM<sub>2.5</sub>) and ozone (O<sub>3</sub>) are among the top  
47 risk factors for global mortality (Forouzanfar et al., 2015; Cohen et al., 2017) and have increased the need  
48 to effectively control anthropogenic sources in order to reduce the ambient concentrations of PM<sub>2.5</sub> and  
49 O<sub>3</sub> (Wang et al., 2017). The challenge is that the dominant contributions to ambient PM<sub>2.5</sub> and O<sub>3</sub> arise  
50 from a series of chemical reactions among precursors, including sulfur dioxide (SO<sub>2</sub>), nitrogen oxides  
51 (NO<sub>x</sub>), ammonia (NH<sub>3</sub>) and volatile organic compounds (VOCs) (**Seinfeld and Pandis, 2012**). The  
52 complexity of the chemical reactions and pathways associated with variations in meteorological  
53 conditions and precursor levels results in strong nonlinear responses of PM<sub>2.5</sub> and O<sub>3</sub> to their precursor  
54 emission changes (West et al., 1999; Hakami et al., 2004; Cohan et al., 2005; Pun et al., 2007; Megaritis  
55 et al., 2013). Such nonlinearity issues are a major challenge for policy-makers to design an effective  
56 control strategy.

57 **Chemical species in the atmosphere are often highly correlated with one another, since their**  
58 **concentrations are affected by common atmospheric physical processes (e.g., mixing and transport) and**  
59 **chemical reactions. Concentrations of pollutants such as O<sub>3</sub> and PM<sub>2.5</sub> are typically determined based on**  
60 **the ambient levels of their gaseous precursors, implying that O<sub>3</sub> and PM<sub>2.5</sub> chemistry can be identified**  
61 **through a combination of concentrations of some of their related chemical species (i.e., indicators).** The  
62 empirical kinetic modeling approach (EKMA) developed by the U.S. EPA quantifies the relationships of  
63 O<sub>3</sub> with its precursor concentrations based on O<sub>3</sub> chemistry (Freas et al., 1978; Gipson et al., 1981). The  
64 EKMA plot can aid inference of control strategy effectiveness (e.g., NO<sub>x</sub> or VOC control) according to  
65 VOC-to-NO<sub>x</sub> ratios. Several studies have developed “observable” indicators by relating O<sub>3</sub> to reactive

66 nitrogen concentrations and species related to atmospheric oxidation. Such indicators include  $\text{NO}_y$ ,  
67  $\text{H}_2\text{O}_2/\text{HNO}_3$ ,  $\text{HCHO}/\text{NO}_2$  and  $\text{H}_2\text{O}_2/(\text{O}_3+\text{NO}_2)$  (Milford et al., 1994; Sillman, 1995; Tonnesen and Dennis,  
68 2000; Sillman and He, 2002), which can be used to identify  $\text{NO}_x$ -saturated or -limited regimes. The  $\text{O}_3$   
69 indicators can be derived from surface-monitoring observations (Peng et al., 2006), modeling simulations  
70 (Wang et al., 2010), or even satellite retrievals (Jin et al., 2017; Sun et al., 2018), and then examined using  
71 three-dimensional chemical transport models (CTMs) (Jiménez et al., 2004; Zhang et al., 2009; Liu et al.,  
72 2010; Ye et al., 2016). Regarding  $\text{PM}_{2.5}$  chemistry (more specifically for inorganic  $\text{PM}_{2.5}$  sensitivities to  
73  $\text{NH}_3$  and  $\text{NO}_x$ ), indicators such as the degree of sulfate neutralization (DSN), gas ratio (GR), and adjusted  
74 gas ratio (AdjGR) have been developed (defined in Text S1) to identify  $\text{NH}_3$ -poor or -rich conditions  
75 (Ansari and Pandis, 1998; Takahama et al., 2004; Pinder et al., 2008; Dennis et al., 2008). The indicator-  
76 based method can be efficient in determining the chemical regime in the current scenarios and in  
77 qualitatively estimating  $\text{O}_3$  and  $\text{PM}_{2.5}$  sensitivities to small perturbations in precursor emissions or ambient  
78 concentrations without involving complex CTMs. However, traditional indicator methods are unable to  
79 quantify the extent of the chemistry regime (Pinder et al., 2008); hence, the traditional observable  
80 indicators provide policy-makers limited information for reducing  $\text{O}_3$  and  $\text{PM}_{2.5}$  pollution.

81 The sensitivity of  $\text{O}_3$  and  $\text{PM}_{2.5}$  to precursor emissions can be explored by running multiple brute-  
82 force CTM simulations. For instance, the response surface model (RSM) developed from brute-force  
83 simulations can generate a wide range of  $\text{O}_3$  and  $\text{PM}_{2.5}$  responses to precursor emissions ranging from  
84 fully controlled to doubled emissions (i.e., -100 % to 100 % change relative to the baseline emission)  
85 (Xing et al., 2011; Wang et al., 2011). Based on the RSM, the chemical response indicators of Peak Ratio  
86 (PR) and Flex Ratio (FR) have been designed to identify regimes of  $\text{O}_3$  and  $\text{PM}_{2.5}$  chemistry, respectively  
87 (see Xing et al., 2018 for detailed description of PR and FR). In contrast to the observable indicators, the  
88 PR and FR are meaningful values that represent the exact transition point at which a chemistry regime

89 converts to another regime. With the recent development of the polynomial function-based RSM (pf-  
90 RSM), the PR and FR can be easily calculated (Xing et al., 2018). However, this method is built on at  
91 least 20 CTM simulations; in other words, the estimating the PR and FR requires considerable computing  
92 resources. As a result, RSM use remains limited despite recent improvements in RSM efficiency (Xing et  
93 al., 2017).

94 Over the preceding decade, China's air quality has undergone substantial changes. In particular, the  
95 enactment of the *Air Pollution Prevention and Control Action Plan* from 2013 to 2017 greatly reduced  
96 PM<sub>2.5</sub> exposure (Zhao et al., 2018; Ding et al., 2019a). However, during this period, significant increases  
97 in O<sub>3</sub> concentrations were observed in most Chinese cities (Li et al., 2018). The rate of increase in O<sub>3</sub>  
98 concentration (based on the 90th percentile of daily maximum of 8-hr running average) was approximately  
99 27 %, 19 %, and 8 % in the North China Plain (NCP), Yangtze River Delta (YRD), and Pearl River Delta  
100 (PRD), respectively (Ding et al., 2019b). Greater control over anthropogenic sources must be enforced to  
101 reduce PM<sub>2.5</sub> and O<sub>3</sub> concentrations (Lu et al., 2018). Notably, accurate quantification of the nonlinear  
102 responses of O<sub>3</sub> and PM<sub>2.5</sub> to their precursor emissions is critical and a prerequisite for effective mitigation  
103 of **air pollution** in China.

104 **The design of an effective O<sub>3</sub> and PM<sub>2.5</sub> control strategy requires efficient quantification of air**  
105 **pollutant sensitivity to precursor emissions.** Indicator studies have demonstrated that the nonlinear  
106 response of O<sub>3</sub> and PM<sub>2.5</sub> to precursors can be estimated by using ambient concentrations of related  
107 chemical species. It is expected that the response indicators originally derived from RSM predictions (i.e.,  
108 PR and FR) can also be calculated using a combination of ambient concentrations of certain chemical  
109 species, enabling these indicators to become “observable” indicators rather than being dependent on  
110 numerous CTM simulations. To support the needs of policy design for O<sub>3</sub> and PM<sub>2.5</sub> control, this study  
111 developed effective indicators that not only represent O<sub>3</sub> and PM<sub>2.5</sub> chemistry but also aid in determining

112 the most feasible emission reduction path, similar to the benefits provided by RSM-based indicators. The  
113 flow of this study is presented in Fig. 1. The new observable response indicators were developed by  
114 investigating the link between observable and RSM-based indicators in China.

115 The remainder of this paper is structured as follows: Section 2 presents the detailed methods for  
116 CTM modeling, RSM configuration and response indicator development. Section 3 presents the  
117 evaluation of the performance of observable indicators in predicting the chemistry regime and the  
118 development of the observable response indicators and discusses their policy implications. Section 4  
119 summarizes the main conclusions of this study.

## 120 **2. Method**

### 121 **2.1. Configuration of the CTM and RSM**

122 In this study, the Community Multi-scale Air Quality (CMAQ) model (version 5.2) was used to  
123 simulate the baseline concentrations of O<sub>3</sub> and PM<sub>2.5</sub> and their responses in numerous emission control  
124 scenarios with different emission change ratios. The simulation was conducted on a domain covering  
125 China with 27 km × 27 km horizontal resolution (Fig. 2). In 2017, January, April, July, and October were  
126 simulated to represent winter, spring, summer, and fall, respectively. An annual level was estimated as the  
127 average of the levels in these four months. The concentration data was analyzed based on the monthly  
128 average for afternoon O<sub>3</sub> (12:00–18:00 China Standard Time when O<sub>3</sub> was the highest across a day), and  
129 monthly average for 24-h PM<sub>2.5</sub>. To approximate exposure concentrations, we also estimated population-  
130 weighted O<sub>3</sub> and PM<sub>2.5</sub> at the regional or national level by averaging the gridded concentrations weighted  
131 by the population in each grid cell. The gridded population data were obtained from the 1 km × 1 km  
132 LandScan population dataset in 2016 (Oak Ridge National Laboratory, 2013).

133 The anthropogenic emission data were developed by Tsinghua University by using a bottom-up  
134 method (Ding et al., 2019a), with updated activity data from the 2017 China statistical yearbook as well

135 as the latest application rates of end-of-pipe control technologies based on the governmental bulletin and  
136 reports. The anthropogenic emissions were gridded into  $27\text{ km} \times 27\text{ km}$  horizontal resolution to match the  
137 CMAQ model (Fig. S1). The 2017 biogenic emissions over China were generated using the Model for  
138 Emissions of Gases and Aerosols from Nature (MEGAN; version 2.04). The meteorology field, driven by  
139 the Weather Research and Forecasting Model (WRF; version 3.7), followed the same configuration as that  
140 in our previous study (Ding et al., 2019a,b), and thus included the Morrison double-moment microphysics  
141 scheme, the RRTMG radiation scheme, Kain-Fritsch cumulus cloud parameterization, the Pleim-Xiu land-  
142 surface physics scheme, and the ACM2 PBL physics scheme. We used NCEP FNL (Final) Operational  
143 Global Analysis data for the initial and boundary conditions in the WRF. The comparison with observation  
144 data from the National Climatic Data Center suggested agreeable performance of the WRF model for  
145 simulating wind speed, humidity and temperature (Table S1). The CMAQ model performance in  
146 reproducing  $\text{O}_3$  and  $\text{PM}_{2.5}$  concentrations was evaluated by comparison with the ground-based  
147 observations (Fig. S2), which suggested acceptable CMAQ model performance that met the recommended  
148 benchmark (Ding et al., 2019a,b). **The normalized mean biases of CMAQ in predicting  $\text{PM}_{2.5}$  and  $\text{O}_3$  are**  
149 **-16.4% and -12.5% compared with monitoring data obtained from the China National Environmental**  
150 **Monitoring Centre. The mean fractional biases for  $\text{PM}_{2.5}$  and  $\text{O}_3$  prediction are -14.2% and -11.1%,**  
151 **respectively (within the benchmark of  $\pm 60\%$ ). The mean fractional errors for  $\text{PM}_{2.5}$  and  $\text{O}_3$  prediction are**  
152 **21.6% and 17.0% respectively (within the benchmark of 75%).** The RSM was developed based on multiple  
153 CTM simulations for various emission-control scenarios according to the brute-force method. Identical to  
154 our previous RSM studies (Xing et al., 2017, 2018), the responses of  $\text{O}_3$  and  $\text{PM}_{2.5}$  to precursor emissions  
155 were analyzed using the baseline case and 40 control scenarios using the Latin Hypercube Sample method  
156 for four control variables, namely the emission ratios of  $\text{NO}_x$ ,  $\text{SO}_2$ ,  $\text{NH}_3$ , and VOCs. **Though the responses**  
157 **of  $\text{O}_3$  and  $\text{PM}_{2.5}$  to local or regional emissions vary significantly as suggested in our previous study (Xing**

158 et al., 2011), we applied the same change ratio of each pollutant emission to all regions across China in  
159 this study. This approach is consistent with the implementation of a multi-regional joint control strategy,  
160 which is reasonable for China. The same level of local and regional emission reduction has been  
161 recommended to achieve China's aggressive air quality goals (Xing et al., 2019).

162 The control matrix is provided in Table S2. The range of emission changes is set as 0 to 2 to be  
163 consistent with our previous studies in which the pf-RSM performance has been well examined (Xing et  
164 al., 2011; Wang et al., 2011; Xing et al., 2018; Ding et al., 2019b). The pf-RSM performance in predicting  
165 PM<sub>2.5</sub> and O<sub>3</sub> responses has been evaluated in detail using leave-one-out cross validation as well as the  
166 out-of-sample validation method, with normalized errors all within 5% for both PM<sub>2.5</sub> and O<sub>3</sub> across the  
167 domain. Relatively large biases occurred for marginal cases, where emissions are controlled by nearly  
168 100% and predicted concentrations are very small. These cases have limited influence on the shape of  
169 nonlinear curve of the response function. However, the RSM is developed from a suite of CMAQ  
170 simulations, and so uncertainties in the chemical mechanism used in CMAQ might influence the O<sub>3</sub> and  
171 PM<sub>2.5</sub> predictions.

## 172 2.2. RSM-based indicators of O<sub>3</sub> and PM<sub>2.5</sub> chemistry

173 Based on the developed pf-RSM, the nonlinear responses of O<sub>3</sub> and PM<sub>2.5</sub> concentrations to  
174 precursor emissions can be represented as follows:

$$175 \quad \Delta Conc = \sum_{i=1}^n X_i \cdot (\Delta E_{NOx})^{a_i} \cdot (\Delta E_{SO2})^{b_i} \cdot (\Delta E_{NH3})^{c_i} \cdot (\Delta E_{VOCs})^{d_i} \quad (1)$$

176 where  $\Delta Conc$  is the change in O<sub>3</sub> or PM<sub>2.5</sub> concentration from the baseline concentration calculated from  
177 a polynomial function of four variables ( $\Delta E_{NOx}$ ,  $\Delta E_{SO2}$ ,  $\Delta E_{NH3}$ ,  $\Delta E_{VOCs}$ );  $\Delta E_{NOx}$ ,  $\Delta E_{SO2}$ ,  $\Delta E_{NH3}$ , and  $\Delta E_{VOCs}$   
178 are the change ratios of NO<sub>x</sub>, SO<sub>2</sub>, NH<sub>3</sub>, and VOC emissions (i.e.,  $\Delta Emissions / Baseline\_Emissions$ ),  
179 respectively, relative to the baseline emissions (baseline = 0); and  $a_i$ ,  $b_i$ ,  $c_i$ , and  $d_i$  are the nonnegative  
180 integer powers of  $\Delta E_{NOx}$ ,  $\Delta E_{SO2}$ ,  $\Delta E_{NH3}$ , and  $\Delta E_{VOCs}$ , respectively.  $X_i$  is the coefficient of term  $i$  for the 14



181 ( $n$ ) terms listed in Table 1.

182 The terms used to represent PM<sub>2.5</sub> and O<sub>3</sub> responses were determined in designing the pf-RSM  
183 (Table 1). The high-degree terms of NO<sub>x</sub>, VOCs and NH<sub>3</sub> represent their strong nonlinear contributions to  
184 O<sub>3</sub> or PM<sub>2.5</sub>. The interaction terms of NO<sub>x</sub> and VOC for PM<sub>2.5</sub> and O<sub>3</sub> represent the nonlinearity in  
185 atmospheric oxidations, whereas those of NO<sub>x</sub> and NH<sub>3</sub> for PM<sub>2.5</sub> represent aerosol thermodynamics (Xing  
186 et al., 2018).

187  $X_i$  was fitted by 40 CTM control scenarios for each spatial grid cell. The  $X_i$  values in the pf-RSM  
188 for annual-averaged population-weighted O<sub>3</sub> and PM<sub>2.5</sub> concentrations in 31 provinces in China are  
189 provided in Table S3 and Table S4, respectively. The terms with first degree for NO<sub>x</sub>, SO<sub>2</sub>, NH<sub>3</sub>, and  
190 VOCs represent the first derivative of PM<sub>2.5</sub> and O<sub>3</sub> response to each precursor emission. O<sub>3</sub> was more  
191 sensitive to NO<sub>x</sub> (term X<sub>5</sub>) and VOCs (term X<sub>6</sub>) than to SO<sub>2</sub> (term X<sub>13</sub>) or NH<sub>3</sub> (term X<sub>14</sub>), and O<sub>3</sub>  
192 sensitivity was negative to NO<sub>x</sub> but positive to VOCs in most provinces. PM<sub>2.5</sub> sensitivities to the four  
193 precursors (terms X<sub>1</sub>, X<sub>2</sub>, X<sub>5</sub> and X<sub>11</sub> for VOCs, NH<sub>3</sub>, SO<sub>2</sub>, and NO<sub>x</sub>, respectively) were comparable,  
194 whereas PM<sub>2.5</sub> sensitivity to NO<sub>x</sub> could be negative or positive.

195 The nonlinearities of O<sub>3</sub> and PM<sub>2.5</sub> to precursors were mainly determined by high-order and  
196 interaction terms. To illustrate such nonlinearities further, we used a series of isopleths, as shown in Fig.  
197 3, as an example to present the national-averaged PM<sub>2.5</sub> response to SO<sub>2</sub> and NH<sub>3</sub>, NO<sub>x</sub> and NH<sub>3</sub>, as well  
198 as PM<sub>2.5</sub> and O<sub>3</sub> responses to NO<sub>x</sub> and VOCs in different months. Strong nonlinearity was noted in PM<sub>2.5</sub>  
199 sensitivity to NH<sub>3</sub>, and in O<sub>3</sub> and PM<sub>2.5</sub> sensitivities to NO<sub>x</sub>. PM<sub>2.5</sub> sensitivity to NH<sub>3</sub> increased alongside  
200 the transition of PM<sub>2.5</sub> chemistry from the NH<sub>3</sub>-rich condition (typically at high NH<sub>3</sub> emission ratios) to  
201 the NH<sub>3</sub>-poor condition (typically at low NH<sub>3</sub> emission ratios). O<sub>3</sub> and PM<sub>2.5</sub> sensitivities to NO<sub>x</sub> were  
202 negative under the NO<sub>x</sub>-saturated regime (typically at high NO<sub>x</sub> emission ratios) but became positive  
203 under the NO<sub>x</sub>-limited regime (typically at low NO<sub>x</sub> emission ratios). In addition, the transition points

204 (corresponding to the NO<sub>x</sub> or NH<sub>3</sub> ratios at which the chemical regime for O<sub>3</sub> or PM<sub>2.5</sub> chemistry changed)  
 205 varied by time (Fig. 3) and space (see the isopleths at different provinces in Figs S3-S6). In general, the  
 206 NH<sub>3</sub>-poor condition appears in winter because of low NH<sub>3</sub> evaporation and little agriculture activity which  
 207 is a dominant NH<sub>3</sub> source. The strong NO<sub>x</sub>-saturated condition appears in winter when photolysis is less  
 208 active than in other seasons, and concentrates in industrial regions with abundant NO<sub>x</sub> emissions.

209 To further quantify the aforementioned nonlinearity, two RSM-based response indicators (i.e., the  
 210 PR for O<sub>3</sub> and FR for PM<sub>2.5</sub>) were calculated as described in our previous studies (Xing et al., 2011, 2018;  
 211 Wang et al., 2011).

212 For O<sub>3</sub>, the PR can be directly calculated as follows:

$$213 \quad PR = 1 + \Delta E_{NOx} \Big|_{\frac{\partial \Delta Conc_{O_3}}{\partial \Delta E_{NOx}}=0} E_{NOx} \in [a, b] \quad (2)$$

214 where  $\frac{\partial \Delta Conc_{O_3}}{\partial \Delta E_{NOx}}$  is the first derivative of the  $\Delta Conc_{O_3}$  to  $\Delta E_{NOx}$ , which can be derived as follows:

$$215 \quad 5 * X_1 * \Delta E_{NOx}^4 + 4 * X_2 * \Delta E_{NOx}^3 + 3 * X_3 * \Delta E_{NOx}^2 + 2 * X_4 * \Delta E_{NOx} + X_5 = 0 \quad (3)$$

216 The PR is the NO<sub>x</sub> emissions (represented as  $1 + \Delta E_{NOx}$ ) that produce maximum O<sub>3</sub> concentration  
 217 under the baseline VOC emissions. For  $PR < 1$ , the baseline condition is NO<sub>x</sub> saturated, and the level of  
 218 simultaneous control of VOCs to prevent an increase in O<sub>3</sub> levels from the NO<sub>x</sub> controls must be  
 219 understood. This level is defined by the ratio of VOCs to NO<sub>x</sub> (i.e., VNr) corresponding to the PR and is  
 220 calculated as follows:

$$221 \quad VNr = r \Big|_{\frac{\partial \Delta Conc_{O_3}}{\partial \Delta E_{NOx}}=0} \quad \text{when } PR < 1, \quad r = \Delta E_{VOC} / \Delta E_{NOx} \quad (4)$$

222 where  $\frac{\partial \Delta Conc_{O_3}}{\partial \Delta E_{NOx}}$  is the first derivative of the  $\Delta Conc_{O_3}$  to  $\Delta E_{NOx}$ . When  $\Delta E_{VOC} = r \times \Delta E_{NOx}$ , and  $\Delta E_{SO_2}$

223 and  $\Delta E_{NH_3}$  are 0,  $\frac{\partial \Delta Conc_{O_3}}{\partial \Delta E_{NOx}}$  can be written as follows:

$$224 \quad 5 * X_1 * \Delta E_{NOx}^4 + 4 * X_2 * \Delta E_{NOx}^3 + 3 * X_3 * \Delta E_{NOx}^2 + 2 * X_4 * \Delta E_{NOx} + X_5 + X_6 * r + 2 * X_7 *$$

$$r^2 * \Delta E_{NOx} + 3 * X_8 * r^3 * \Delta E_{NOx}^2 + 2 * X_9 * r * \Delta E_{NOx}^2 + 4 * X_{10} * r^3 * \Delta E_{NOx}^3 + 6 * X_{11} * r * \Delta E_{NOx}^5 + 3 * X_{12} * r * \Delta E_{NOx}^2 = 0 \quad (5)$$

Since the  $\Delta E_{NOx}$  is close to 0 when the controls are taken from the baseline, we ignore the terms of  $\Delta E_{NOx}$  in the first derivative function above, then it can be written as follows,

$$X_5 + X_6 * r = 0 \quad (6)$$

The VNr therefore can be calculated using the following equation:

$$VNr = - \frac{X_5}{X_6} \quad (7)$$

For PM<sub>2.5</sub>, the FR can be directly calculated from the polynomial function of PM<sub>2.5</sub> by estimating the second derivative of the PM<sub>2.5</sub> response to NH<sub>3</sub> emissions without considering interaction with other pollutants (Xing et al., 2018). In this study, we selected a simplified method to calculate the FR, estimated as the corresponding NH<sub>3</sub> emission ratio when the PM<sub>2.5</sub> sensitivity to NH<sub>3</sub> and NO<sub>x</sub> emissions is equal under the baseline conditions (similar to the definition in Wang et al (2011), but here we calculated the sensitivity of PM<sub>2.5</sub> instead of nitrate in this study):

$$FR = 1 + \Delta E_{NH3} \left| \frac{\partial \Delta Conc_{PM}}{\partial \Delta E_{NH3}} = \frac{\partial \Delta Conc_{PM}}{\partial \Delta E_{NOx}} \right. \Delta E_{NH3} \in [a, b], \Delta E_{NOx} = 0, \quad (8)$$

where  $\frac{\partial \Delta Conc_{PM}}{\partial \Delta E_{NH3}}$  and  $\frac{\partial \Delta Conc_{PM}}{\partial \Delta E_{NOx}}$  are the first derivatives of the  $\Delta Conc_{PM}$  to  $\Delta E_{NH3}$  and  $\Delta E_{NOx}$ , respectively, and  $\Delta E_{NH3}$  can be obtained as follows:

$$3 * X_4 * \Delta E_{NH3}^2 + (2 * X_3 - X_{10}) * \Delta E_{NH3} + X_2 - X_{11} = 0 \quad (9)$$

The FR is the NH<sub>3</sub> emissions (represented as  $1 + \Delta E_{NH3}$ ) that correspond to the inflection point between NH<sub>3</sub>-rich and -poor conditions under baseline NO<sub>x</sub> emissions. A FR greater than 1 indicates that the baseline condition is NH<sub>3</sub> poor, and a FR less than 1 indicates that the baseline condition is NH<sub>3</sub> rich. The extra benefit in PM<sub>2.5</sub> reduction (denoted as  $\Delta C_{NH3}$ ) from simultaneous NH<sub>3</sub> controls in the same percentage as the required NO<sub>x</sub> controls can be quantified as follows:

247 
$$\Delta C_{NH_3} = \left( \frac{\partial \Delta Conc_{PM_{2.5}}}{\partial \Delta E_{NO_x}} \Big|_{\Delta E_{NH_3} = \Delta E_{NO_x}} \right) - \left( \frac{\partial \Delta Conc_{PM_{2.5}}}{\partial \Delta E_{NO_x}} \Big|_{\Delta E_{NH_3} = 0} \right) \quad (10)$$

248 where

249  $\frac{\partial \Delta Conc_{PM_{2.5}}}{\partial \Delta E_{NO_x}} \Big|_{\Delta E_{NH_3} = \Delta E_{NO_x}}$  is the first derivative of the  $\Delta Conc_{PM_{2.5}}$  response to  $\Delta E_{NO_x}$  when  $\Delta E_{NH_3} =$

250  $\Delta E_{NO_x}$ , and

251  $\frac{\partial \Delta Conc_{PM_{2.5}}}{\partial \Delta E_{NO_x}} \Big|_{\Delta E_{NH_3} = 0}$  is the first derivative of the  $\Delta Conc_{PM_{2.5}}$  response to  $\Delta E_{NO_x}$  when  $\Delta E_{NH_3} = 0$ .

252  $\Delta C_{NH_3}$  can be calculated as follows:

253 
$$\Delta C_{NH_3} = X_2 \quad (11)$$

### 254 **2.3. Observable indicators of O<sub>3</sub> and PM<sub>2.5</sub> chemistry**

255 Zhang et al. (2009) summarized the various observable indicators with their corresponding transition  
 256 values to identify O<sub>3</sub> and PM<sub>2.5</sub> chemistry: O<sub>3</sub> indicators were H<sub>2</sub>O<sub>2</sub>/HNO<sub>3</sub>, H<sub>2</sub>O<sub>2</sub>/(O<sub>3</sub>+NO<sub>2</sub>), NO<sub>y</sub>, O<sub>3</sub>/NO<sub>x</sub>,  
 257 O<sub>3</sub>/NO<sub>y</sub>, O<sub>3</sub>/NO<sub>z</sub>, HCHO/NO<sub>y</sub>, and HCHO/NO<sub>2</sub>, and the PM<sub>2.5</sub> indicators were the DSN, GR, and AdjGR  
 258 (defined in Text S1); these indicators have been used extensively in previous research (Liu et al., 2010;  
 259 Wang et al., 2011; Ye et al., 2016). In the current study, we evaluated all the aforementioned indicators  
 260 except DSN (DSN is included in the definition of the AdjGR, thus it was not considered as a separate  
 261 indicator in this study). The original transition values, summarized by Zhang et al (2009), are listed in  
 262 Table 2. In the present study, we examined these transition values and compared their performance in  
 263 predicting O<sub>3</sub> and PM<sub>2.5</sub> chemistry. Because the RSM-based indicators, PR and FR, are calculated using  
 264 the multiple CTM simulations that use state-of-the-science representations of O<sub>3</sub> and PM<sub>2.5</sub> chemistry,  
 265 these indicators were assumed to represent the true condition for comparison with the condition predicted  
 266 using observable indicators. The performance of each observable indicator is described by its success rate,  
 267 which is the ratio of the number of correct predictions to the total number of predictions. A correct  
 268 prediction is indicated by the observable indicator providing consistent results for O<sub>3</sub> or PM<sub>2.5</sub> chemistry

269 as suggested by PR or FR. The comparison is only conducted for spatial grid cells with valid PR or FR  
270 values within the range of 0 (fully controlled emissions) to 2 (double emissions).

271 As RSM-based indicators, the PR and FR have meaningful values that can be used to illustrate the  
272 extent of the chemistry regime. The linkage of observable indicators with the PR and FR was investigated  
273 by performing a linear-log regression of the value of the original observable indicator and the values of  
274 the PR or FR as follows:

$$275 \quad \log(Y) = A \cdot X + B \quad (12)$$

276 where  $Y$  is an observable indicator for  $O_3$  or  $PM_{2.5}$ ,  $X$  is the RSM-based indicator (i.e., PR for  $O_3$  or FR  
277 for  $PM_{2.5}$ ), and the coefficients  $A$  and  $B$  are estimated based on statistical regression. Therefore, the  
278 observable response indicators ( $X'$ ) can be calculated as follows:

$$279 \quad X' = \frac{\log(Y) - B}{A} \quad (13)$$

280 The observable response indicators have the same policy implication as that of PR or FR, but they  
281 can be directly calculated from the baseline concentrations of certain chemical species rather than being  
282 derived from multiple CTM simulations. Therefore, these indicators are considerably more efficient than  
283 are traditional RSM-based indicators.

## 284 **3. Results**

### 285 **3.1. Evaluating observable indicator performance in predicting chemistry regimes**

#### 286 **3.1.1. $O_3$**

287 Observable indicators and the PR are compared in Fig. 4, and the performance of observable  
288 indicators in predicting  $O_3$  chemistry is summarized in Table 2. In general, strong correlation was noted  
289 between the observable indicators and PR. The indicator with the highest annual success rate was  
290  $H_2O_2/HNO_3$  approximately 73.4 %, with a value of 0.2 for the transition from  $NO_x$ -saturated to  $NO_x$ -

291 limited conditions. However, the original transition value of 0.2 for  $\text{H}_2\text{O}_2/\text{HNO}_3$  tended to be too low,  
292 particularly in April, July, and October (see Fig. 4a). This study found that the annual success rate of  
293  $\text{H}_2\text{O}_2/\text{HNO}_3$  could be increased to 80.5 % if 0.3 was used as the transition value. This finding was  
294 consistent with corresponding findings in previous studies, which have suggested the transition values of  
295  $\text{H}_2\text{O}_2/\text{HNO}_3$  within the range of 0.2-3.6 at different locations and in different seasons (Sillman, 1995;  
296 Sillman et al, 1997; Lu and Chang, 1998; Tonnesen and Dennis, 2000; Hammer et al, 2002; Liang et al,  
297 2006; Zhang et al., 2009).  $\text{H}_2\text{O}_2/(\text{O}_3+\text{NO}_2)$ , with a transition value of 0.02, also exhibited a high annual  
298 success rate of 66.4 %; this rate could be increased to 71.1 % by applying a transition value of 0.005  
299 because the original transition value was too high, particularly in January, April, and October (see Fig. 4b).  
300  $\text{HCHO}/\text{NO}_y$  and  $\text{HCHO}/\text{NO}_2$  exhibited relatively low performance, particularly in April and July, because  
301 the original transition values appeared to be too high (Fig. 4h and i). **However, the performance of**  
302  **$\text{HCHO}/\text{NO}_y$  and  $\text{HCHO}/\text{NO}_2$  could be greatly improved by using lower transition values, with increased**  
303 **annual success rates as high as 76 %. The change of the transition values implies that such indicators**  
304 **cannot fully consider all factors that determine the  $\text{O}_3$  chemistry by using concentrations of just two**  
305 **species.** The transition values of the indicators  $\text{NO}_y$ ,  $\text{O}_3/\text{NO}_x$ ,  $\text{O}_3/\text{NO}_y$ , and  $\text{O}_3/\text{NO}_z$  were suitable for  
306 estimating annual levels if only one unique transition value was applied for all months (apparently, these  
307 transition values for  $\text{O}_3/\text{NO}_x$ ,  $\text{O}_3/\text{NO}_y$  and  $\text{O}_3/\text{NO}_z$  in January, and  $\text{NO}_x$  in April and July may have been  
308 too low). However, their success rates (all < 70 %) were not as high as those of other indicators. The  
309 inferior performance of the three  $\text{O}_3$ -involved indicators ( $\text{O}_3/\text{NO}_x$ ,  $\text{O}_3/\text{NO}_y$  and  $\text{O}_3/\text{NO}_z$ ) may have been  
310 associated with the considerable effects of background  $\text{O}_3$ , which cannot be removed easily.

311 Because  $\text{H}_2\text{O}_2/(\text{O}_3+\text{NO}_2)$  and  $\text{HCHO}/\text{NO}_2$  exhibited good performance in predicting  $\text{O}_3$  chemistry,  
312 this study proposed a new indicator combining these two indicators, namely  $\text{H}_2\text{O}_2 \times \text{HCHO}/\text{NO}_2$ , with a  
313 transition value of 0.3. The results suggested that this new indicator has the highest annual success rate,

314 namely 87.3 %, among all the indicators. Studies (Sillman, 1995; Tonnesen and Dennis, 2000) have  
315 suggested that HCHO is approximately proportional to the VOC reactivity (i.e., the weighted sum of the  
316 reactions of VOCs with OH) and that HCHO/NO<sub>2</sub> closely approximates the competition between OH  
317 reactions with VOC and NO<sub>2</sub> that is central to O<sub>3</sub> chemistry. H<sub>2</sub>O<sub>2</sub> derives from a key radical termination  
318 pathway under low NO<sub>x</sub> conditions (HO<sub>2</sub> + HO<sub>2</sub> → H<sub>2</sub>O<sub>2</sub> + O<sub>2</sub>). Comparison of H<sub>2</sub>O<sub>2</sub> with NO<sub>y</sub> or HNO<sub>3</sub>,  
319 which derives from a key radical termination pathway under high NO<sub>x</sub> conditions, OH + NO<sub>2</sub> → HNO<sub>3</sub>)  
320 represents the relative abundance of VOCs to NO<sub>x</sub>. The new hybrid indicator incorporates information  
321 from the two individual indicators and could potentially be more robust.

### 322 3.1.2 PM<sub>2.5</sub>

323 We selected the GR and AdjGR as observable indicators for PM<sub>2.5</sub> chemistry to identify NH<sub>3</sub>-poor  
324 or NH<sub>3</sub>-rich conditions. Comparison of GR and AdjGR with the FR is detailed in Fig. 5. AdjGR  
325 performance was much higher than that of the GR, with a larger annual success rate of 74.1 % compared  
326 with the GR's 55.6 % (see Table 3). The transition value of the GR appeared to be too low in all months  
327 (Fig. 5a). This result was consistent with those of previous studies; the AdjGR tends to be a more robust  
328 indicator because in contrast to the GR, it does not require an assumption of full sulfate neutralization  
329 (Zhang et al., 2009). The improvement of AdjGR compared to GR is the greatest in January and the  
330 smallest in July (Table 3). This is consistent with Pinder et al. (2008) who showed that accounting for  
331 DSN is important under cold temperatures but GR and AdjGR converge for higher temperatures.

332 This study designed a new indicator, total ammonia ratio (TAR), where the sulfate concentration is  
333 involved in the calculation, as follows:

$$334 \quad TAR = \frac{[TA]^2}{[TN] \times [TS]} = \frac{[NH_3] \times [NH_4^+]}{([HNO_3] + [NO_3^-]) \times [SO_4^{2-}]}, \quad (14)$$

335 where [TN] and [TS] are the total molar concentrations of nitrate ([HNO<sub>3</sub>] + [NO<sub>3</sub><sup>-</sup>]) and sulfate

336 ( $[SO_4^{2-}]$ ), respectively, and TAR is the relative abundance of total ammonia to nitrate and sulfate, regarded  
337 as the product of  $[TA]/[TN]$  and  $[TA]/[TS]$ . To simplify the calculation,  $[TA]^2$  is assumed to be the  
338 product of the molar concentration of ammonia gas  $[NH_3]$  and ammonium  $[NH_4^+]$ .

339 The performance of TAR in predicting  $PM_{2.5}$  chemistry was slightly higher than that of AdjGR, as  
340 demonstrated by the higher success rate of TAR than that of AdjGR in all months. The annual success rate  
341 of TAR was 79.6 %, with a transition value of 10 (Table 3).

## 342 3.2 Developing the observable responsive indicators

### 343 3.2.1 $O_3$

344 Fig. 6 presents the log-linear regressions of the  $O_3$  observable indicators on the PR indicator derived  
345 from the RSM. In general, all observable indicators exhibited strong correlations with the PR (all except  
346  $NO_y$  presented positive correlations with the PR), with varying  $R^2$  values (0.08 – 0.75). The indicators  
347 including  $NO_y$ ,  $O_3/NO_x$ ,  $O_3/NO_y$ , and  $O_3/NO_z$ , which had relatively low success rates, exhibited weaker  
348 correlation with the PR ( $R^2 < 0.31$ ; Fig. 6c-f). The newly developed  $H_2O_2 \times HCHO/NO_2$  indicator exhibited  
349 the strongest correlation with the PR ( $R^2 = 0.75$ ), implying that the log-linear combination of the  $H_2O_2$ ,  
350  $HCHO$ , and  $NO_2$  baseline concentrations could approximate the responsive PR indicator to quantify  $O_3$   
351 chemistry. Other indicators can also be used to approximately estimate the PR based on the regression  
352 coefficients shown in Fig. 6; however, their correlations with the PR were not as strong as those with  
353  $H_2O_2 \times HCHO/NO_2$ .

354 To evaluate the ability of the observable PR (oPR; estimated based on  $H_2O_2 \times HCHO/NO_2$ ) to  
355 represent the spatial and temporal variation of  $O_3$  chemistry, the spatial distribution of the PR and oPR in  
356 the four study months was compared across the simulated domain (Fig. 7). The oPR successfully captured  
357 the strong  $NO_x$ -saturated regime in January ( $PR < 1$ ) and the  $NO_x$ -limited ( $PR > 1$ ) regime in July.



358 In addition, the PR and oPR suggested a consistently strong NO<sub>x</sub>-saturated regime in northern and  
359 eastern China and key regions such as the YRD and PRD. The domain-averaged oPRs were 0.97, 1.52,  
360 1.73, and 1.37 in January, April, July, and October, respectively; these values are similar to the PRs (0.77,  
361 1.24, 1.38, and 1.17, respectively). Thus, the oPR may approximate the PR to quantify the O<sub>3</sub> chemistry,  
362 even on a large spatial and temporal scale.

### 363 3.2.2. PM<sub>2.5</sub>

364 The correlations between PM<sub>2.5</sub> observable indicators and the responsive FR indicator derived from  
365 the RSM were investigated (Fig. 8). The AdjGR has the lowest R<sup>2</sup> (0.40) because of its high variations for  
366 the NH<sub>3</sub>-poor condition (Fig. 5b). A stronger positive correlation was noted between the GR and FR (R<sup>2</sup>  
367 = 0.57); however, the success rate of the GR was the lowest among all the indicators (the success rate of  
368 the GR increased when the transition value was set as the median value of the GR, namely 5, at an FR of  
369 1). The TAR exhibited the strongest positive correlation with the FR (R<sup>2</sup> = 0.60), implying that the FR can  
370 be approximately estimated by the log-linear combination of baseline concentrations of ammonia gas,  
371 nitric acid gas, particulate ammonium, sulfate, and nitrate.

372 The capability of the observable FR (oFR; estimated based on the TAR indicator) in representing  
373 the spatial and temporal variation of PM<sub>2.5</sub> chemistry is illustrated in Fig. 9. Both the FR and oFR  
374 suggested strong NH<sub>3</sub>-poor condition (FR > 1) in January and NH<sub>3</sub>-rich condition (FR < 1) in April and  
375 July. The oFR suggested strong NH<sub>3</sub>-rich condition in northern and eastern China and the Sichuan Basin;  
376 these findings were consistent with those for the FR. The domain-averaged oFRs were 1.56, 1.05, 0.86,  
377 and 1.24 in January, April, July, and October, respectively, with the strongest NH<sub>3</sub>-poor condition in  
378 January and NH<sub>3</sub>-rich condition in July. These findings were comparable with the FRs of 1.47, 1.16, 0.95,  
379 and 1.19 for the four study months, respectively, suggesting that the oFR can approximate the FR to  
380 quantify the PM<sub>2.5</sub> chemistry and its spatial and temporal variations.

### 381 3.3. Policy implications

#### 382 3.3.1. O<sub>3</sub>

383 The responsive PR indicator may help policy-makers to understand the status and extent of O<sub>3</sub>  
384 chemistry in the current scenarios. A lower PR (< 1) suggested a NO<sub>x</sub>-saturated regime. Moreover, the  
385 VNr could be used to inform policy-makers about the level of simultaneous control of VOCs required to  
386 prevent an increase in O<sub>3</sub> levels from NO<sub>x</sub> controls. In general, the VNr is negatively correlated with the  
387 PR because a lower PR implies a stronger NO<sub>x</sub>-saturated regime, which in turn requires more simultaneous  
388 VOC control with NO<sub>x</sub>. By contrast, a higher PR implies a weaker NO<sub>x</sub>-saturated or even NO<sub>x</sub>-limited  
389 regime, which requires less or no simultaneous control of VOCs with NO<sub>x</sub>. The negative correlation  
390 between VNr and the PR was quantified by the simple linear regression of VNr on PR (Fig. S7). A high  
391 R<sup>2</sup> (approximately 0.82) suggested that the VNr originally derived from the RSM can also be  
392 approximately estimated from the PR or oPR.

393 Figure 10 presents a comparison of the VNr derived from the RSM, with the VNr calculated based  
394 on the oPR, estimated by the H<sub>2</sub>O<sub>2</sub>×HCHO/NO<sub>2</sub> indicator and denoted as oVNr. Consistent spatial and  
395 temporal variations were found for VNr and oVNr. Additional simultaneous VOC control is required in  
396 January and in northern and eastern China, and is highly correlated with the low PR (Fig. 7). The domain-  
397 averaged oVNr values were estimated to be 0.95, 0.43, 0.38, and 0.47 in January, April, July, and October,  
398 respectively, with the highest and lowest oVNr values noted in January and July, respectively. That is  
399 comparable with VNr in the four study months (i.e., 0.82, 0.46, 0.34, and 0.57, respectively).

400 The annual-averaged VNr and PR were also calculated for each province in China (Fig. 11). VNr  
401 was negatively correlated with the PR at the provincial level. The northern provinces, namely Heilongjiang,  
402 Xinjiang, and Liaoning required the highest VNr (1-1.2) because their PRs were very low (0.3-0.4). In the  
403 NCP, including the province of Tianjin, Hebei, Henan, Shandong, Shanxi, Inner Mongolia, and Beijing,

404 high VNr (0.7-0.9) was required to overcome the stronger NO<sub>x</sub>-saturated regime (PR = 0.4-0.6). The  
405 coastal provinces, namely Fujian, and Guangdong, and middle-eastern provinces, namely Jiangxi and  
406 Hunan, also demonstrated relatively high PRs (>0.7) and low VNr (<0.3).

### 407 3.3.2. PM<sub>2.5</sub>

408 Using the responsive FR indicator or its observable oFR indicator can rapidly identify NH<sub>3</sub>-rich or  
409 NH<sub>3</sub>-poor conditions, and this information can aid policy-makers in estimating the additional PM<sub>2.5</sub> benefit  
410 associated with simultaneous control of NH<sub>3</sub> and NO<sub>x</sub> emissions ( $\Delta C_{NH_3}$ ). As discussed in Section 2.2,  
411  $\Delta C_{NH_3}$  can be calculated from the RSM using the first derivative of the PM<sub>2.5</sub> responsive function to  
412 NH<sub>3</sub>. Therefore,  $\Delta C_{NH_3}$  must be strongly associated with the secondary inorganic aerosol (SNA)  
413 concentration, as suggested in Fig. S8, which demonstrates a strong correlation between SNA  
414 concentration and  $\Delta C_{NH_3}$ . The linear regression with high R<sup>2</sup> (>0.71) implies that the  $\Delta C_{NH_3}$  can be  
415 approximately calculated based on the SNA concentration.

416 The  $\Delta C_{NH_3}$  estimated based on the SNA concentration (o $\Delta C_{NH_3}$ ; based on the regression  
417 function in Fig. S8) was compared with that derived from the RSM (Fig. 12). The o $\Delta C_{NH_3}$  typically  
418 captured the spatial and temporal variation of  $\Delta C_{NH_3}$ , suggesting large benefits in January and October,  
419 particularly in eastern China and the Sichuan Basin. The domain-averaged  $\Delta C_{NH_3}$  values were  
420 approximately 0.31, 0.22, 0.16, and 0.38  $\mu\text{g m}^{-3}$  PM<sub>2.5</sub> per 10 % NH<sub>3</sub> reduction in January, April, July, and  
421 October respectively. In April and July, o $\Delta C_{NH_3}$  presented consistent results approximately 0.21 and  
422 0.16  $\mu\text{g m}^{-3}$  PM<sub>2.5</sub>, respectively, per 10 % NH<sub>3</sub> reduction, but slightly underestimated the benefits in  
423 January and October (0.24 and 0.22  $\mu\text{g m}^{-3}$  PM<sub>2.5</sub>, respectively, per 10 % NH<sub>3</sub> reduction).

424 At the annual level,  $\Delta C_{NH_3}$  was compared with the population-weighted PM<sub>2.5</sub> concentration in  
425 each province (Fig. 13).  $\Delta C_{NH_3}$  ranged from 2 to 12  $\mu\text{g m}^{-3}$  PM<sub>2.5</sub> per 10 % NH<sub>3</sub> reduction. In addition,  
426 the provinces with higher PM<sub>2.5</sub> exposure exhibited additional benefits from NH<sub>3</sub> reductions (i.e., high

427  $\Delta C_{\text{NH}_3}$ ), particularly in Hunan, Shandong, Tianjin, Jiangxi, Anhui, Henan, and Hubei where  $\Delta C_{\text{NH}_3}$   
428 was  $> 8 \mu\text{g m}^{-3}$   $\text{PM}_{2.5}$  per 10 %  $\text{NH}_3$  reduction. These benefits from simultaneous  $\text{NH}_3$  control were  
429 substantial enough to be considered in these regions for achieving the national ambient  $\text{PM}_{2.5}$  target ( $35$   
430  $\mu\text{g m}^{-3}$ ).

### 431 3.3.3. Cobenefits of $\text{NO}_x$ and VOC control in reducing $\text{O}_3$ and $\text{PM}_{2.5}$

432  $\text{NO}_x$  and VOCs are major precursors for  $\text{O}_3$  and  $\text{PM}_{2.5}$ , and effectively controlling their emissions  
433 can lead to cobenefits in reducing  $\text{O}_3$  and  $\text{PM}_{2.5}$ . The PR results suggest strong  $\text{NO}_x$ -saturated regimes in  
434 northern and eastern China including key regions such as the Sichuan Basin, YRD, and PRD, where  
435 simultaneous VOC control with a certain VOC-to- $\text{NO}_x$  ratio is required to prevent increases in  $\text{O}_3$  levels  
436 from the  $\text{NO}_x$  controls.  $\text{PM}_{2.5}$  sensitivity to  $\text{NO}_x$  can be negative under a strong  $\text{NO}_x$ -saturated regime; this  
437 effect is not as significant as it is for  $\text{O}_3$  (Fig. 3). We quantified the nonlinearity of  $\text{PM}_{2.5}$  sensitivity to  $\text{NO}_x$   
438 by using the same PR concept but for  $\text{PM}_{2.5}$  response (Text S2); Fig. S9 presents the spatial distribution  
439 of the PR to identify  $\text{PM}_{2.5}$  sensitivity to  $\text{NO}_x$  emission in the four study months. The PR values for  $\text{PM}_{2.5}$   
440 were  $> 1$  in April, July, and October in all grid cells across China, suggesting that  $\text{NO}_x$  control is always  
441 beneficial for  $\text{PM}_{2.5}$  reduction during these months. Even in January, the PR for  $\text{PM}_{2.5}$  (0.4-0.8 in eastern  
442 and northern China) remains larger than that for  $\text{O}_3$  (0.2-0.6 in eastern and northern China), implying that  
443 the suggested VNr for  $\text{O}_3$  was high enough to overcome the potential limitations on  $\text{PM}_{2.5}$  reduction from  
444  $\text{NO}_x$  control.

445 To explore the cobenefits of reducing  $\text{O}_3$  and  $\text{PM}_{2.5}$  after simultaneous control of  $\text{NO}_x$  and VOCs,  
446 we investigated the effectiveness of six control pathways with various VOC-to- $\text{NO}_x$  ratios including 0,  
447 0.2, 0.4, 0.6, 0.8 and 1.0 (Fig. 14). In general,  $\text{O}_3$  and  $\text{PM}_{2.5}$  concentrations can be reduced in all months  
448 through simultaneous control of  $\text{NO}_x$  and VOC emissions, although different VNr and control levels are  
449 required in different months. In January (under strongly  $\text{NO}_x$ -saturated conditions), reductions in  $\text{PM}_{2.5}$

450 and O<sub>3</sub> require VOC emission controls in addition to NO<sub>x</sub> controls to prevent potential disbenefits  
451 associated with the nonlinear chemistry. The smaller VNr required for PM<sub>2.5</sub> (~0.4) than for O<sub>3</sub> (~1.0) in  
452 this case might be associated with the smaller PR for PM<sub>2.5</sub> as well as the additional benefit of VOC  
453 controls in reducing secondary organic aerosols. Apparently, a larger VNr control ratio and greater  
454 emission control is required in January compared with other months. In Fig. 14(a), only one pathway can  
455 achieve simultaneous reduction in O<sub>3</sub> and PM<sub>2.5</sub> concentrations (i.e., the pathway with VNr equal to 1 and  
456 at the far end of the pathway, with reduction rates > 80%). In April and October, simultaneous VOC  
457 controls were still required for O<sub>3</sub> (VNr = 0.2-0.6) but not for PM<sub>2.5</sub>. In July when NO<sub>x</sub>-limited regime  
458 was dominant, the NO<sub>x</sub> control was critical because the VOC controls had little effect on either O<sub>3</sub> or  
459 PM<sub>2.5</sub>. At the annual level, the simultaneous VOC controls (40 % of the NO<sub>x</sub> controls) led to cobenefits in  
460 reducing both O<sub>3</sub> and PM<sub>2.5</sub> at the national level. However, VNr varied significantly in different seasons,  
461 suggesting that considering the seasonality of O<sub>3</sub> and PM<sub>2.5</sub> chemistry is necessary for design of a season-  
462 specific control strategy.

#### 463 **4. Summary and conclusion**

464 Compared with conducting multiple CTM simulations, the indicator method proved more efficient  
465 in identifying the chemical regime in the current scenarios. However, the traditional indicators are not as  
466 useful as the RSM-based PR and FR indicators for policy-makers to infer feasible emission reduction  
467 paths. Therefore, this study quantified the relationship between RSM-based and traditional-observable  
468 indicators and developed new observable response indicators, the oPR and oFR, which can be used to  
469 quantify the nonlinearity of O<sub>3</sub> and PM<sub>2.5</sub> response to precursor emissions. Similar to the traditional  
470 indicators, the oPR and oFR can be easily calculated using a combination of ambient concentrations of  
471 certain chemical species obtained from surface-monitored observations, modeling simulations, or even  
472 satellite retrievals. In addition, the observable responsive indicators can not only rapidly identify the

473 chemical regime but also provide policy-makers with useful information, such as simultaneous VOC  
474 controls to prevent increases in O<sub>3</sub> levels from NO<sub>x</sub> controls under the NO<sub>x</sub>-saturated regime (i.e., VNr),  
475 as well as the additional benefit of simultaneously reducing NH<sub>3</sub> alongside NO<sub>x</sub> control in PM<sub>2.5</sub> reductions  
476 (i.e., ΔC\_NH<sub>3</sub>). Since the indicators are developed from simulations with spatially uniform emission  
477 controls across the country, they are especially useful for providing quick estimates of the potential  
478 benefits or risks from uniform controls. These estimates can also provide a basis to design more localized  
479 control strategies for particular regions.

480 This study proposed a new O<sub>3</sub>-chemistry indicator, namely H<sub>2</sub>O<sub>2</sub>×HCHO/NO<sub>2</sub>, and PM<sub>2.5</sub>-chemistry  
481 indicator, namely the TAR, both of which exhibited the highest success rates among all the indicators.  
482 This study also suggested that the log-linear combinations of baseline H<sub>2</sub>O<sub>2</sub>, HCHO, and NO<sub>2</sub>  
483 concentrations could provide an approximate PR to quantify O<sub>3</sub> chemistry spatially and temporally.  
484 Similarly, the log-linear combination of baseline concentrations of ammonia gas, nitric acid gas,  
485 particulate ammonium, sulfate and nitrate can be used to approximately estimate the FR for PM<sub>2.5</sub>  
486 chemistry. The VNr was highly correlated with the PR, suggesting that a stronger NO<sub>x</sub>-saturated regime  
487 requires greater VOC control accompanied by NO<sub>x</sub> control. The positive correlation between ΔC\_NH<sub>3</sub>  
488 and the population-weighted PM<sub>2.5</sub> concentration suggested that a province with high PM<sub>2.5</sub> exposure can  
489 gain greater benefits from NH<sub>3</sub> reduction. Finally, simultaneous control of NO<sub>x</sub> and VOC could reduce  
490 both O<sub>3</sub> and PM<sub>2.5</sub> throughout the year, and an effective control pathway (VNr = 0.4) could lead to the  
491 cobenefits of reducing both O<sub>3</sub> and PM<sub>2.5</sub>. However, VNr varied significantly among the seasons and  
492 provinces, suggesting the necessity of considering the seasonality of chemistry and of designing a more  
493 localized control strategy for each province. We note that the discrepancy between the observable indicator  
494 and the responsive indicator might also be influenced by uncertainties in the chemical mechanism of  
495 CMAQ as well as prediction errors of the pf-RSM. The new indicators were designed based on the existing

496 chemical mechanism, and the transition values might be refined in the future as our understanding of  
497 atmospheric chemical processes improves.

498 In conclusion, the two unique aspects of this study are as follows. First, quantification of the  
499 correlation of observable indicators with responsive indicators (Fig. 5 and 7) implied that the traditional  
500 observable indicators, based on monitored or satellite-retrieved concentrations, can be used to quantify  
501 the nonlinearity of  $PM_{2.5}$  and  $O_3$  to precursor emission and provide useful policy implications. Second,  
502 this study reported a promising method for efficiently establishing  $PM_{2.5}$ - and  $O_3$ - responsive functions to  
503 precursors for traditional responsive or reduced-form modeling studies. This study suggested that the PR  
504 or FR (a combination of coefficients in the polynomial functions in the pf-RSM) can be approximately  
505 estimated using the ambient concentration of certain chemical species. Similarly, all coefficients in  
506 polynomial functions can be calculated based on a set of ambient concentrations of certain chemical  
507 species. The simple log-linear regression method used in this study demonstrated the possibility that even  
508 in the presence of uncertainties in prediction, more advanced data analytics technologies such as deep  
509 learning may improve performance in future.

510

## 511 **Data availability**

512 The pf-RSM outputs and code package are available upon request from the corresponding author.

## 513 **Author contribution**

514 These authors contributed equally to this work: Jia Xing & Dian Ding. JX designed the methodology  
515 and wrote the paper. DD conducted the modeling experiment and analyzed the data. SW provided ideas  
516 and financial support and edited the paper. ZD and YZ helped with the modeling experiment. JK, CJ and  
517 JH provided ideas and edited the paper.

## 518 **Acknowledgements**

519 This work was supported in part by National Key R & D program of China (2017YFC0210006),  
520 National Natural Science Foundation of China (21625701&51861135102), National Research Program  
521 for Key Issues in Air Pollution Control (DQGG0301& DQGG0204), and Shanghai Environmental  
522 Protection Bureau (2016-12). This work was completed on the “Explorer 100” cluster system of Tsinghua  
523 National Laboratory for Information Science and Technology.

524

## 525 **Disclaimer**

526 Although this work was reviewed by EPA and approved for publication, the views in the article are  
527 those of the authors alone and do not necessarily reflect the policy of the Agency. Mention of commercial  
528 products does not constitute endorsement by the Agency.

529

530

## 531 **Reference**

- 532 Ansari, A. S., and S. N. Pandis: Response of inorganic PM to precursor concentrations, *Environ. Sci.*  
533 *Technol.*, 32, 2706–2714, 1998.
- 534 Cohan, D.S., Hakami, A., Hu, Y., Russell, A.G.: Nonlinear response of ozone to emissions: source  
535 apportionment and sensitivity analysis. *Environ. Sci. Technol.*, 39, 6739-6748, 2005.
- 536 Cohen, A.J., Brauer, M., Burnett, R., Anderson, H.R., Frostad, J., Estep, K., Balakrishnan, K., Brunekreef,  
537 B., Dandona, L., Dandona, R., Feigin, V.: Estimates and 25-year trends of the global burden of  
538 disease attributable to ambient air pollution: an analysis of data from the Global Burden of  
539 Diseases Study 2015. *The Lancet*, 389(10082), 1907-1918, 2017.
- 540 Dennis, R.L., Bhawe, P.V. and Pinder, R.W. Observable indicators of the sensitivity of PM<sub>2.5</sub> nitrate to  
541 emission reductions—Part II: Sensitivity to errors in total ammonia and total nitrate of the CMAQ-  
542 predicted non-linear effect of SO<sub>2</sub> emission reductions. *Atmospheric Environment*, 42(6),  
543 pp.1287-1300, 2008.
- 544 Ding, D., Xing, J., Wang, S., Liu, K. and Hao, J.: Estimated Contributions of Emissions Controls,  
545 Meteorological Factors, Population Growth, and Changes in Baseline Mortality to Reductions in  
546 Ambient PM<sub>2.5</sub> and PM<sub>2.5</sub>-Related Mortality in China, 2013–2017. *Environmental health*  
547 *perspectives*, 127(6), 067009, 2019a.



548 Ding, D., Xing, J., Wang, S., Chang, X. and Hao, J.: Impacts of emissions and meteorological changes on  
549 China's ozone pollution in the warm seasons of 2013 and 2017, *Front. Environ. Sci. Eng.* 2019,  
550 13(5): 76, 2019b.

551 Forouzanfar, M.H., Alexander, L., Anderson, H.R., Bachman, V.F., Biryukov, S., Brauer, M., Burnett, R.,  
552 Casey, D., Coates, M.M., Cohen, A., Delwiche, K.: Global, regional, and national comparative risk  
553 assessment of 79 behavioural, environmental and occupational, and metabolic risks or clusters of  
554 risks in 188 countries, 1990–2013: a systematic analysis for the Global Burden of Disease Study  
555 2013. *The Lancet*, 386 (10010), 2287–2323, 2015.

556 Freas, W. P., Martinez, E. L., Meyer, E. L., Possiel, N. C., and Sennett, D. H.: Procedures for quantifying  
557 relationships between photochemical oxidants and precursors: supporting documentation, 1978.

558 Friedlander, S.K. Smoke, dust and haze: Fundamentals of aerosol behavior. New York, Wiley-Interscience,  
559 1977. 333pp.

560 Fuhrer, J., Val Martin, M. , Mills, G. , Heald, C.L., Harmens, H., Hayes, F., Sharps, K., Bender, J., Ashmore,  
561 M.R.: Current and future ozone risks to global terrestrial biodiversity and ecosystem processes.  
562 *Ecology and evolution*, 6(24), 8785-8799, 2016.

563 Gipson, G. L., Freas, W. P., Kelly, R. F., and Meyer, E. L.: Guideline for use of city-specific EKMA in  
564 preparing ozone SIPs. EPA-450/4-80-027, US Environmental Protection Agency, Research  
565 Triangle Park, North Carolina, USA, 1981.

566 Hakami, A., Odman, M.T., Russell, A.G.: Nonlinearity in atmospheric response: A direct sensitivity  
567 analysis approach. *Journal of Geophysical Research: Atmospheres*, 109(D15), 2004.

568 Hammer, M.U., Vogel, B. and Vogel, H.: Findings on H<sub>2</sub>O<sub>2</sub>/HNO<sub>3</sub> as an indicator of ozone sensitivity in  
569 Baden-Württemberg, Berlin-Brandenburg, and the Po valley based on numerical simulations.  
570 *Journal of Geophysical Research: Atmospheres*, 107(D22), 2002.

571 Jiménez, P. and Baldasano, J.M.: Ozone response to precursor controls in very complex terrains: Use of  
572 photochemical indicators to assess O<sub>3</sub>-NO<sub>x</sub>-VOC sensitivity in the northeastern Iberian Peninsula.  
573 *Journal of Geophysical Research: Atmospheres*, 109(D20), 2004.

574 Jin, X., Fiore, A.M., Murray, L.T., Valin, L.C., Lamsal, L.N., Duncan, B., Folkert Boersma, K., De Smedt,  
575 I., Abad, G.G., Chance, K. and Tonnesen, G.S.: Evaluating a Space-Based Indicator of Surface  
576 Ozone-NO<sub>x</sub>-VOC Sensitivity Over Midlatitude Source Regions and Application to Decadal  
577 Trends. *Journal of Geophysical Research: Atmospheres*, 122(19), 2017.

578 Li, K., Jacob, D.J., Liao, H., Shen, L., Zhang, Q. and Bates, K.H.: Anthropogenic drivers of 2013–2017  
579 trends in summer surface ozone in China. *Proceedings of the National Academy of  
580 Sciences*, 116(2), pp.422-427, 2019.

581 Liang, J., Jackson, B. and Kaduwela, A.: Evaluation of the ability of indicator species ratios to determine  
582 the sensitivity of ozone to reductions in emissions of volatile organic compounds and oxides of  
583 nitrogen in northern California. *Atmospheric Environment*, 40(27), pp.5156-5166, 2006.

584 Liu, X.H., Zhang, Y., Xing, J., Zhang, Q., Wang, K., Streets, D.G., Jang, C., Wang, W.X., Hao, J.M.:  
585 Understanding of regional air pollution over China using CMAQ, part II. Process analysis and  
586 sensitivity of ozone and particulate matter to precursor emissions. *Atmospheric Environment*,  
587 44(30), 3719-3727, 2010.

588 Lu, C.H. and Chang, J.S.: On the indicator-based approach to assess ozone sensitivities and emissions  
589 features. *Journal of Geophysical Research: Atmospheres*, 103(D3), pp.3453-3462, 1998.

590 Lu, X., Hong, J., Zhang, L., Cooper, O. R., Schultz, M. G., Xu, X., Wang, T., Gao, M., Zhao, Y., and  
591 Zhang, Y.: Severe Surface Ozone Pollution in China: A Global Perspective, *Environmental Science  
592 & Technology Letters*, 5, 487-494, 10.1021/acs.estlett.8b00366, 2018.

593 Megaritis, A.G., Fountoukis, C., Charalampidis, P.E., Pilinis, C. and Pandis, S.N.: Response of fine  
594 particulate matter concentrations to changes of emissions and temperature in Europe. *Atmospheric*  
595 *Chemistry and Physics*, 13(6), 3423-3443, 2013.

596 Milford, J. B., Gao, D. F., Sillman, S., Blosser, P., and Russell, A. G.: Total reactive nitrogen (NO<sub>y</sub>) as  
597 an indicator of the sensitivity of ozone to reductions in hydrocarbon and NO<sub>x</sub> emissions, *Journal*  
598 *of Geophysical Research-Atmospheres*, 99, 3533-3542, 10.1029/93jd03224, 1994.

599 Myhre, G., Shindell, D., Bréon, F.M., Collins, W., Fuglestad, J., Huang, J., Koch, D., Lamarque, J.F.,  
600 Lee, D., Mendoza, B., Nakajima, T. Anthropogenic and Natural Radiative Forcing. In: *Climate*  
601 *Change 2013: The Physical Science Basis. Contribution of Working Group I to the Fifth*  
602 *Assessment Report of the Intergovernmental Panel on Climate Change*, T.F. Stocker et al, Eds.  
603 Cambridge Univ. Press, 2013, 659-740.

604 Oak Ridge National Laboratory. Landsat global population dataset 2012. Oak Ridge, Tennessee: Oak  
605 Ridge National Laboratory, 2013

606 Peng, Y.P., Chen, K.S., Lai, C.H., Lu, P.J. and Kao, J.H.: Concentrations of H<sub>2</sub>O<sub>2</sub> and HNO<sub>3</sub> and O<sub>3</sub>-  
607 VOC-NO<sub>x</sub> sensitivity in ambient air in southern Taiwan. *Atmospheric Environment*, 40(35),  
608 pp.6741-6751, 2006.

609 Pinder, R.W., Dennis, R.L. and Bhave, P.V.: Observable indicators of the sensitivity of PM<sub>2.5</sub> nitrate to  
610 emission reductions—Part I: Derivation of the adjusted gas ratio and applicability at regulatory-  
611 relevant time scales. *Atmospheric Environment*, 42(6), pp.1275-1286, 2008.

612 Pun, B.K., Seigneur, C., Bailey, E.M., Gautney, L.L., Douglas, S.G., Haney, J.L., Kumar, N.: Response of  
613 atmospheric particulate matter to changes in precursor emissions: a comparison of three air quality  
614 models. *Environmental science & technology*, 42(3), 831-837, 2007.

615 Seinfeld, J.H. and Pandis, S.N.: *Atmospheric chemistry and physics: from air pollution to climate change*.  
616 John Wiley & Sons, 2012.

617 Sillman, S.: The use of NO<sub>y</sub>, H<sub>2</sub>O<sub>2</sub>, and HNO<sub>3</sub> as indicators for ozone-NO<sub>x</sub>-hydrocarbon sensitivity in  
618 urban locations. *Journal of Geophysical Research: Atmospheres*, 100(D7), pp.14175-14188., 1995.

619 Sillman, S., He, D., Cardelino, C. and Imhoff, R.E.: The use of photochemical indicators to evaluate  
620 ozone-NO<sub>x</sub>-hydrocarbon sensitivity: Case studies from Atlanta, New York, and Los  
621 Angeles. *Journal of the Air & Waste Management Association*, 47(10), pp.1030-1040, 1997.

622 Sillman, S., and D. He, Some theoretical results concerning O<sub>3</sub>-NO<sub>x</sub>-VOC chemistry and NO<sub>x</sub>-VOC  
623 indicators, *J. Geophys. Res.*, 107(D22), 4659, doi:10.1029/2001JD001123, 2002.

624 Sun, Y., Liu, C., Palm, M., Vigouroux, C., Notholt, J., Hu, Q., Jones, N., Wang, W., Su, W., Zhang, W.,  
625 Shan, C., Tian, Y., Xu, X., De Mazière, M., Zhou, M., and Liu, J.: Ozone seasonal evolution and  
626 photochemical production regime in the polluted troposphere in eastern China derived from high-  
627 resolution Fourier transform spectrometry (FTS) observations, *Atmos. Chem. Phys.*, 18, 14569-  
628 14583, <https://doi.org/10.5194/acp-18-14569-2018>, 2018.

629 Takahama, S., Wittig, A.E., Vayenas, D.V., Davidson, C.I. and Pandis, S.N.: Modeling the diurnal variation  
630 of nitrate during the Pittsburgh Air Quality Study. *Journal of Geophysical Research: Atmospheres*,  
631 109(D16), 2004.

632 Tonnesen, G.S. and Dennis, R.L.: Analysis of radical propagation efficiency to assess ozone sensitivity to  
633 hydrocarbons and NO<sub>x</sub>: 2. Long-lived species as indicators of ozone concentration sensitivity.  
634 *Journal of Geophysical Research: Atmospheres*, 105(D7), pp.9227-9241, 2000.

635 Wang, J., Xing, J., Mathur, R., Pleim, J.E., Wang, S., Hogrefe, C., Gan, C.M., Wong, D.C., Hao, J.:  
636 Historical trends in PM<sub>2.5</sub>-related premature mortality during 1990–2010 across the northern  
637 hemisphere. *Environmental health perspectives*, 125(3), 400pp, 2017.

- 638 Wang, S. X., Xing, J., Jang, C., Zhu, Y., Fu, J.S., Hao, J.: Impact assessment of ammonia emissions on  
639 inorganic aerosols in east China using response surface modeling technique. *Environ. Sci. Technol.*,  
640 45, 9293–9300, 2011.
- 641 Wang, S., Zhao, M., Xing, J., Wu, Y., Zhou, Y., Lei, Y., He, K., Fu, L., & Hao, J.: Quantifying the air  
642 pollutants emission reduction during the 2008 Olympic Games in Beijing. *Environmental science  
643 & technology*, 44(7), 2490-2496, 2010.
- 644 West, J.J., Ansari, A.S., Pandis, S.N. Marginal PM<sub>2.5</sub>: nonlinear aerosol mass response to sulfate  
645 reductions in the Eastern United States. *Journal of the Air & Waste Management Association*,  
646 49(12), 1415-1424, 1999.
- 647 Xing, J., Wang, S. X., Jang, C., Zhu, Y., and Hao, J. M.: Nonlinear response of ozone to precursor emission  
648 changes in China: a modeling study using response surface methodology, *Atmospheric Chemistry  
649 and Physics*, 11, 5027-5044, 10.5194/acp-11-5027-2011, 2011.
- 650 Xing, J., Ding, D., Wang, S., Zhao, B., Jang, C., Wu, W., Zhang, F., Zhu, Y., and Hao, J. Quantification of  
651 the enhanced effectiveness of NO<sub>x</sub> control from simultaneous reductions of VOC and NH<sub>3</sub> for  
652 reducing air pollution in the Beijing–Tianjin–Hebei region, China, *Atmos. Chem. Phys.*, 18, 7799-  
653 7814, <https://doi.org/10.5194/acp-18-7799-2018>, 2018.
- 654 Xing, J., Wang, S., Zhao, B., Wu, W., Ding, D., Jang, C., Zhu, Y., Chang, X., Wang, J., Zhang, F. and Hao,  
655 J.: Quantifying Nonlinear Multiregional Contributions to Ozone and Fine Particles Using an  
656 Updated Response Surface Modeling Technique. *Environmental science & technology*,  
657 51(20),11788-11798, 2017.
- 658 Xing, J., Zhang, F., Zhou, Y., Wang, S., Ding, D., Jang, C., Zhu, Y. and Hao, J.: Least-cost control strategy  
659 optimization for air quality attainment of Beijing–Tianjin–Hebei region in China. *Journal of  
660 environmental management*, 245, 95-104, 2019.
- 661 Ye, L., Wang, X., Fan, S., Chen, W., Chang, M., Zhou, S., Wu, Z. and Fan, Q.: Photochemical indicators  
662 of ozone sensitivity: application in the Pearl River Delta, China. *Frontiers of Environmental  
663 Science & Engineering*, 10(6), p.15, 2016.
- 664 Zhang, J., Wang, T., Chameides, W. L., Cardelino, C., Kwok, J., Blake, D. R., Ding, A., and So, K. L.:  
665 Ozone production and hydrocarbon reactivity in Hong Kong, Southern China, *Atmos. Chem. Phys.*,  
666 7, 557-573, <https://doi.org/10.5194/acp-7-557-2007>, 2007.
- 667 Zhang, Y., Wen, X. Y., Wang, K., Vijayaraghavan, K., and Jacobson, M. Z.: Probing into regional O<sub>3</sub> and  
668 particulate matter pollution in the United States: 2. An examination of formation mechanisms  
669 through a process analysis technique and sensitivity study, *Journal of Geophysical Research-  
670 Atmospheres*, 114, 31, 10.1029/2009jd011900, 2009.
- 671 Zhao, B., Wang, S.X., Xing, J., Fu, K., Fu, J.S., Jang, C., Zhu, Y., Dong, X.Y., Gao, Y., Wu, W.J., Wang,  
672 J.D.: Assessing the nonlinear response of fine particles to precursor emissions: development and  
673 application of an extended response surface modeling technique v1.0. *Geosci. Model Dev.*, 8, 115-  
674 128, 2015.
- 675 Zhao, B., Zheng, H., Wang, S., Smith, K.R., Lu, X., Aunan, K., Gu, Y., Wang, Y., Ding, D., Xing, J. and  
676 Fu, X. Change in household fuels dominates the decrease in PM<sub>2.5</sub> exposure and premature  
677 mortality in China in 2005–2015. *Proceedings of the National Academy of Sciences*, 115(49),  
678 pp.12401-12406, 2018.
- 679  
680

681

682

**Table 1.** Terms in the pf-RSM design for O<sub>3</sub> and PM<sub>2.5</sub>

| Term | O <sub>3</sub>                   | PM <sub>2.5</sub>                |
|------|----------------------------------|----------------------------------|
| 1    | NO <sub>x</sub> <sup>5</sup>     | VOC                              |
| 2    | NO <sub>x</sub> <sup>4</sup>     | NH <sub>3</sub>                  |
| 3    | NO <sub>x</sub> <sup>3</sup>     | NH <sub>3</sub> <sup>2</sup>     |
| 4    | NO <sub>x</sub> <sup>2</sup>     | NH <sub>3</sub> <sup>3</sup>     |
| 5    | NO <sub>x</sub>                  | SO <sub>2</sub>                  |
| 6    | VOC                              | VOC <sup>2</sup>                 |
| 7    | VOC <sup>2</sup>                 | NO <sub>x</sub> VOC              |
| 8    | VOC <sup>3</sup>                 | NO <sub>x</sub> <sup>2</sup> VOC |
| 9    | NO <sub>x</sub> VOC              | NO <sub>x</sub> <sup>4</sup> VOC |
| 10   | NO <sub>x</sub> VOC <sup>3</sup> | NO <sub>x</sub> NH <sub>3</sub>  |
| 11   | NO <sub>x</sub> <sup>5</sup> VOC | NO <sub>x</sub>                  |
| 12   | NO <sub>x</sub> <sup>2</sup> VOC | NO <sub>x</sub> <sup>2</sup>     |
| 13   | SO <sub>2</sub>                  | NO <sub>x</sub> <sup>3</sup>     |
| 14   | NH <sub>3</sub>                  | NO <sub>x</sub> <sup>4</sup>     |

683

684

685

686 **Table 2.** Summary of observable indicators and their performances in predicting O<sub>3</sub> chemistry

| Indicator                                                         | TV*  | success rate at TV (%) |      |      |      |      | TV'          | success rate at TV' (%) |      |      |      |      |
|-------------------------------------------------------------------|------|------------------------|------|------|------|------|--------------|-------------------------|------|------|------|------|
|                                                                   |      | Jan                    | Apr  | Jul  | Oct  | ANN  |              | Jan                     | Apr  | Jul  | Oct  | ANN  |
| H <sub>2</sub> O <sub>2</sub> /HNO <sub>3</sub>                   | 0.2  | 68.8                   | 74.9 | 89.0 | 60.8 | 73.4 | <b>0.3</b>   | 77.9                    | 83.0 | 90.4 | 70.6 | 80.5 |
| H <sub>2</sub> O <sub>2</sub> /(O <sub>3</sub> +NO <sub>2</sub> ) | 0.02 | 81.1                   | 41.9 | 85.4 | 57.4 | 66.4 | <b>0.005</b> | 69.2                    | 73.3 | 88.8 | 53.3 | 71.1 |
| NO <sub>y</sub>                                                   | 5    | 38.9                   | 47.8 | 87.8 | 40.9 | 53.8 | -            | -                       | -    | -    | -    | -    |
| O <sub>3</sub> /NO <sub>x</sub>                                   | 15   | 56.5                   | 75.8 | 58.8 | 71.7 | 65.7 | -            | -                       | -    | -    | -    | -    |
| O <sub>3</sub> /NO <sub>y</sub>                                   | 7    | 60.7                   | 65.8 | 23.3 | 68.2 | 54.5 | -            | -                       | -    | -    | -    | -    |
| O <sub>3</sub> /NO <sub>z</sub>                                   | 7    | 43.5                   | 75.0 | 76.4 | 67.0 | 65.5 | -            | -                       | -    | -    | -    | -    |
| HCHO/NO <sub>y</sub>                                              | 0.28 | 83.9                   | 32.5 | 19.4 | 50.9 | 46.7 | <b>0.1</b>   | 66.7                    | 77.7 | 86.3 | 75.6 | 76.6 |
| HCHO/NO <sub>2</sub>                                              | 1    | 87.3                   | 49.7 | 27.4 | 73.8 | 59.6 | <b>0.5</b>   | 75.7                    | 77.2 | 69.1 | 82.2 | 76.1 |
| H <sub>2</sub> O <sub>2</sub> ×HCHO/NO <sub>2</sub>               | -    | -                      | -    | -    | -    | -    | <b>0.3</b>   | 92.3                    | 81.6 | 89.5 | 86.0 | 87.3 |

687 \* TV- transition value as summarized in Zhang et al (2009); TV' - transition value proposed in this study

688

689

690

691 **Table 3.** Summary of observable indicators and their performances in predicting PM<sub>2.5</sub> chemistry

| Indicator                  | TV   | success rate (%) |      |      |      |      |
|----------------------------|------|------------------|------|------|------|------|
|                            |      | Jan              | Apr  | Jul  | Oct  | ANN  |
| Gas ratio (GR)             | 1*   | 51.7             | 59.3 | 69.6 | 41.7 | 55.6 |
| Adjusted Gas ratio (AdjGR) | 1*   | 81.8             | 73.3 | 74.0 | 67.5 | 74.1 |
| Total Ammonia Ratio (TAR)  | 10** | 86.2             | 77.5 | 80.6 | 74.0 | 79.6 |

692 \* TV- transition value as proposed in Zhang et al (2009);

693 \*\* TV- transition value as proposed in this study

694

695

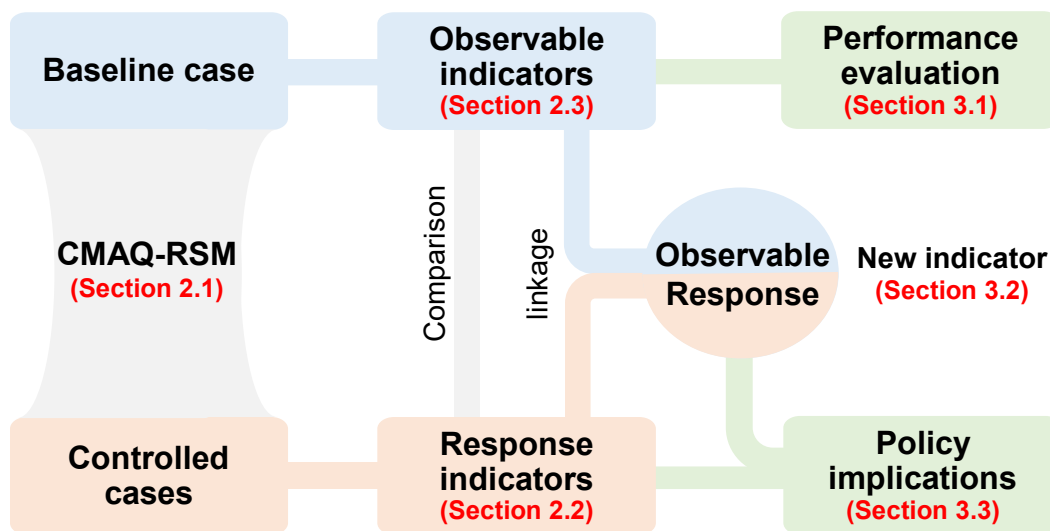

696

697

**Figure 1.** Flow of observable response indicator development and application

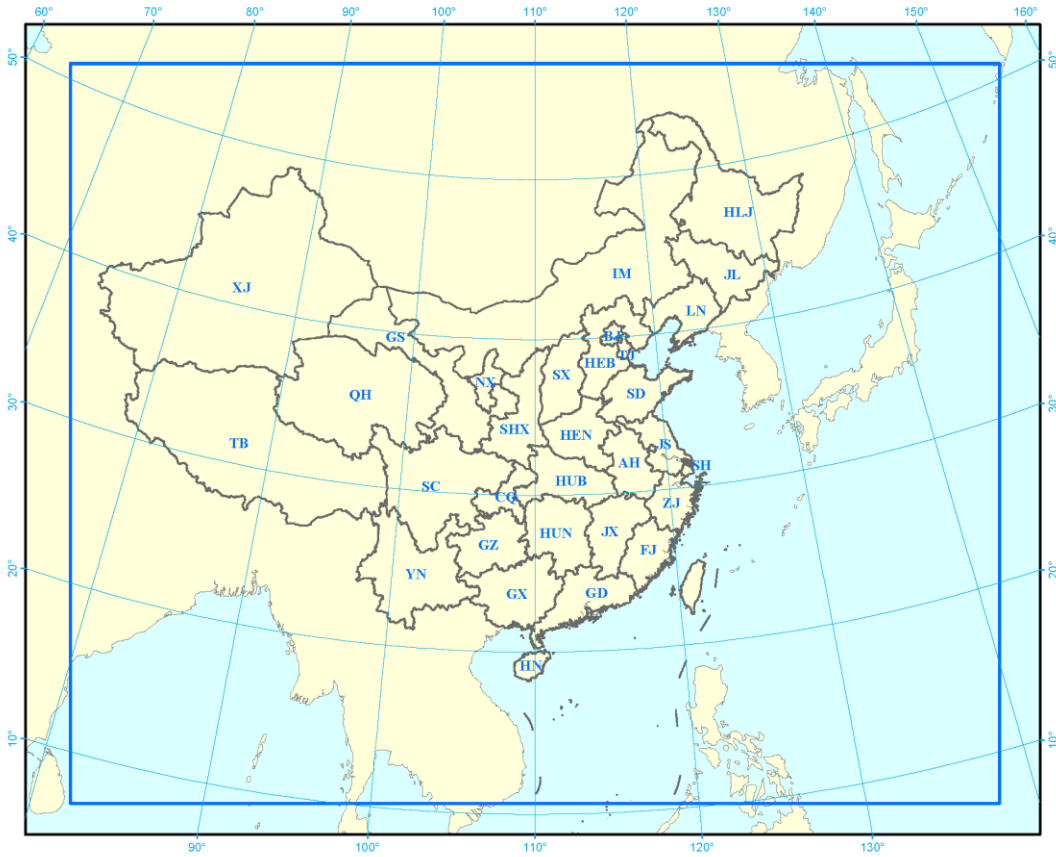

699

700 **Figure 2.** Simulation domain over mainland China ( $27 \times 27$ -km<sup>2</sup> resolution,  $182 \times 232$  grid cells). The  
 701 31 provinces are BJ-Beijing; TJ-Tianjin; HEB- Hebei; SX-Shanxi; IM-Inner Mongolia; LN- Liaoning;  
 702 JL- Jilin; HLJ-Helongjiang; SH- Shanghai; JS-Jiangsu; ZJ-Zhejiang; AH- Anhui; FJ- Fujian; JX-  
 703 Jiangxi; SD- Shandong; HEN- Henan; HUB-Hubei; HUN- Hunan; GD-Guangdong; GX- Guangxi; HN-  
 704 Hainan; CQ- Chongqing; SC- Sichuan; GZ-Guizhou; YN- Yunnan; TB- Tibet; SHX-Shaanxi; GS-  
 705 Gansu; QH-Qinghai; NX- Ningxia; and XJ-Xinjiang)

706



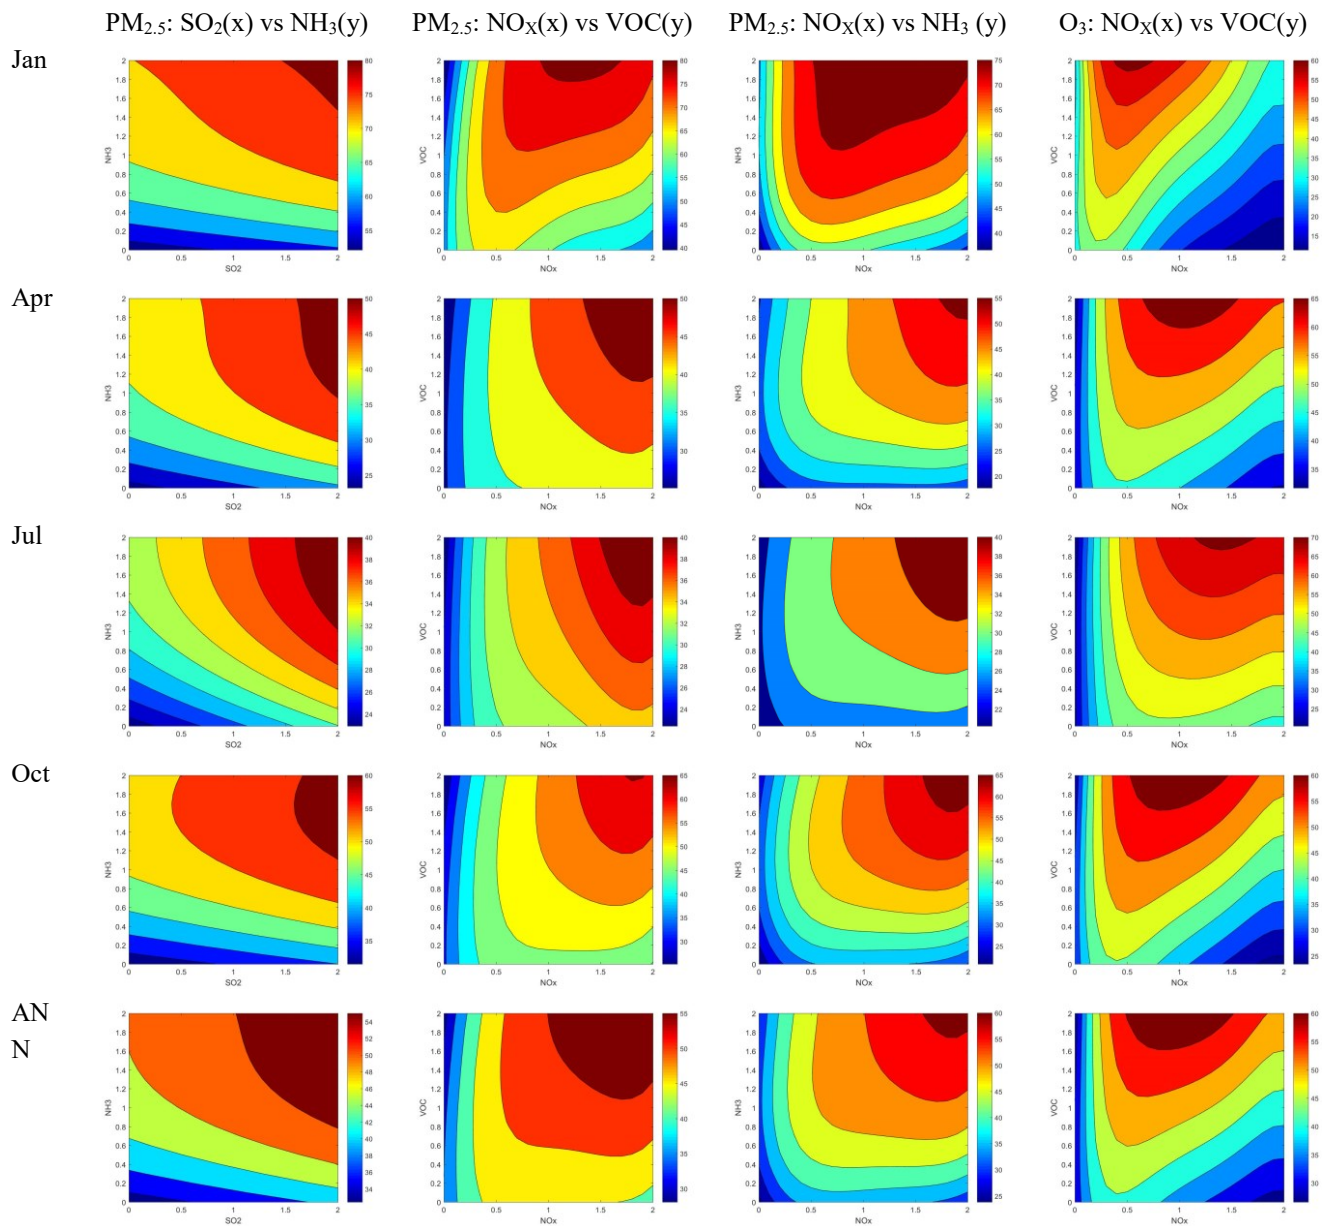

707 **Figure 3.** Isopleth of population-weighted PM<sub>2.5</sub> and daytime O<sub>3</sub> to precursor emission change in  
 708 different months. (The x- and y- axes represent precursor emission rates with a baseline of 1, applied to  
 709 all grid cells in China; background colors represent the population-weighted PM<sub>2.5</sub> and daytime O<sub>3</sub>  
 710 concentrations in China, with units of  $\mu\text{g m}^{-3}$  for PM<sub>2.5</sub> and ppb for O<sub>3</sub>)

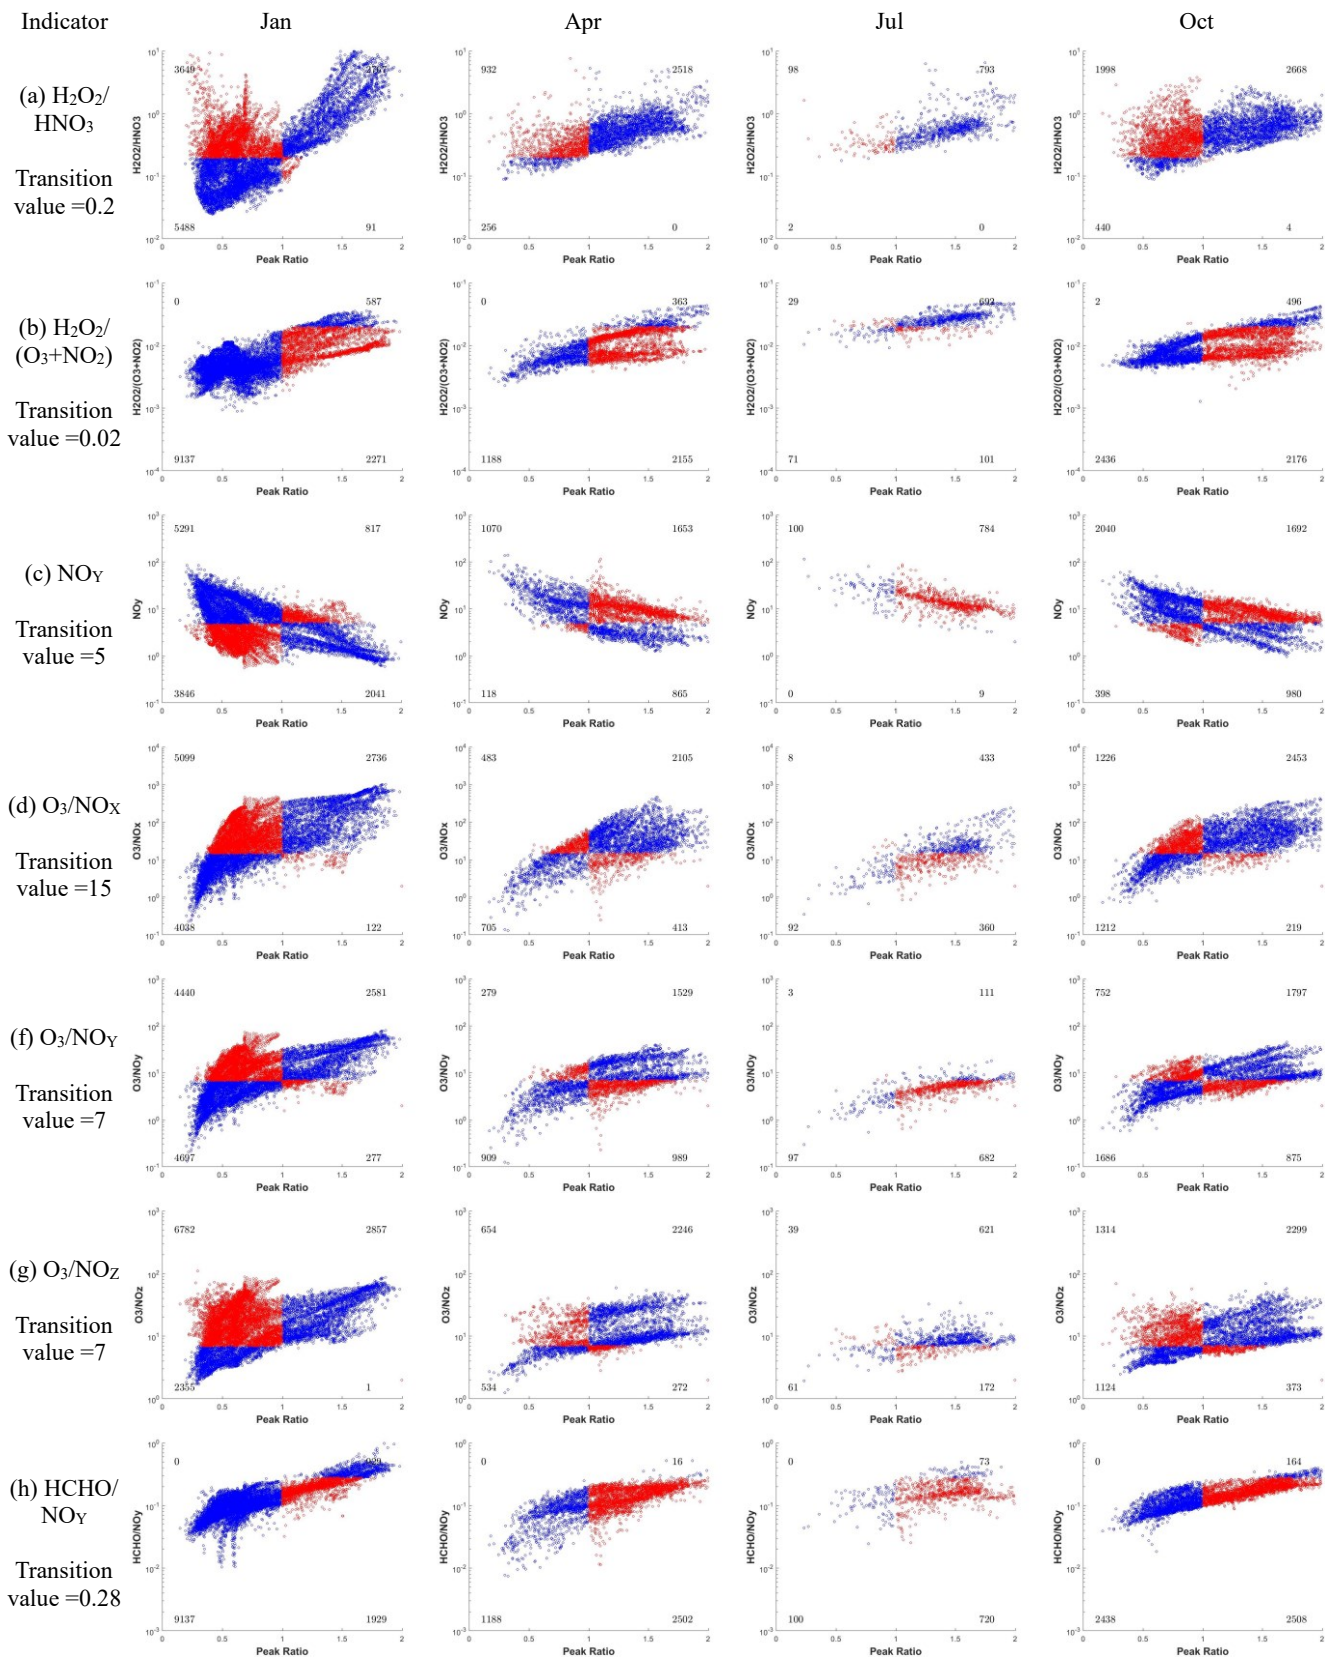

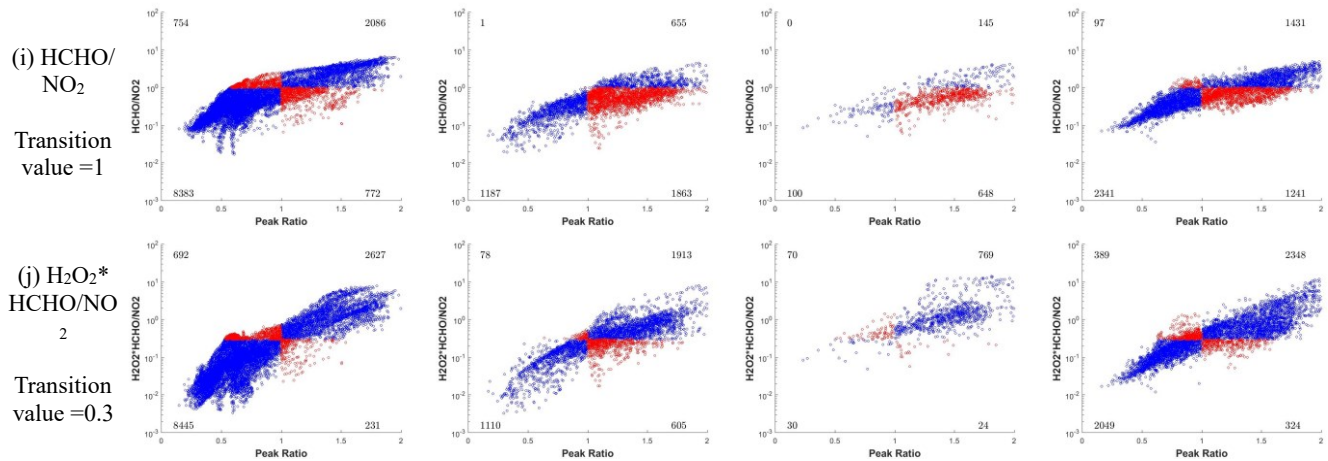

711 **Figure 4.** Performance of observable indicators in predicting  $\text{O}_3$  chemistry. The x-axis represents the PR  
 712 values where the transition value is 1, and the y-axis represents the observable indicators. The blue dots  
 713 represent the grids where  $\text{O}_3$  chemistry is successfully predicted by the observable indicator; the red dots  
 714 represent the grids where the observable indicator fails to predict  $\text{O}_3$  chemistry. The numbers in the four  
 715 corners represent the grid number in each section; the number in July is much lower than those in the  
 716 other months because most grids are located at the  $\text{NO}_x$ -limited regime with  $\text{PR} > 2$  in July.

717

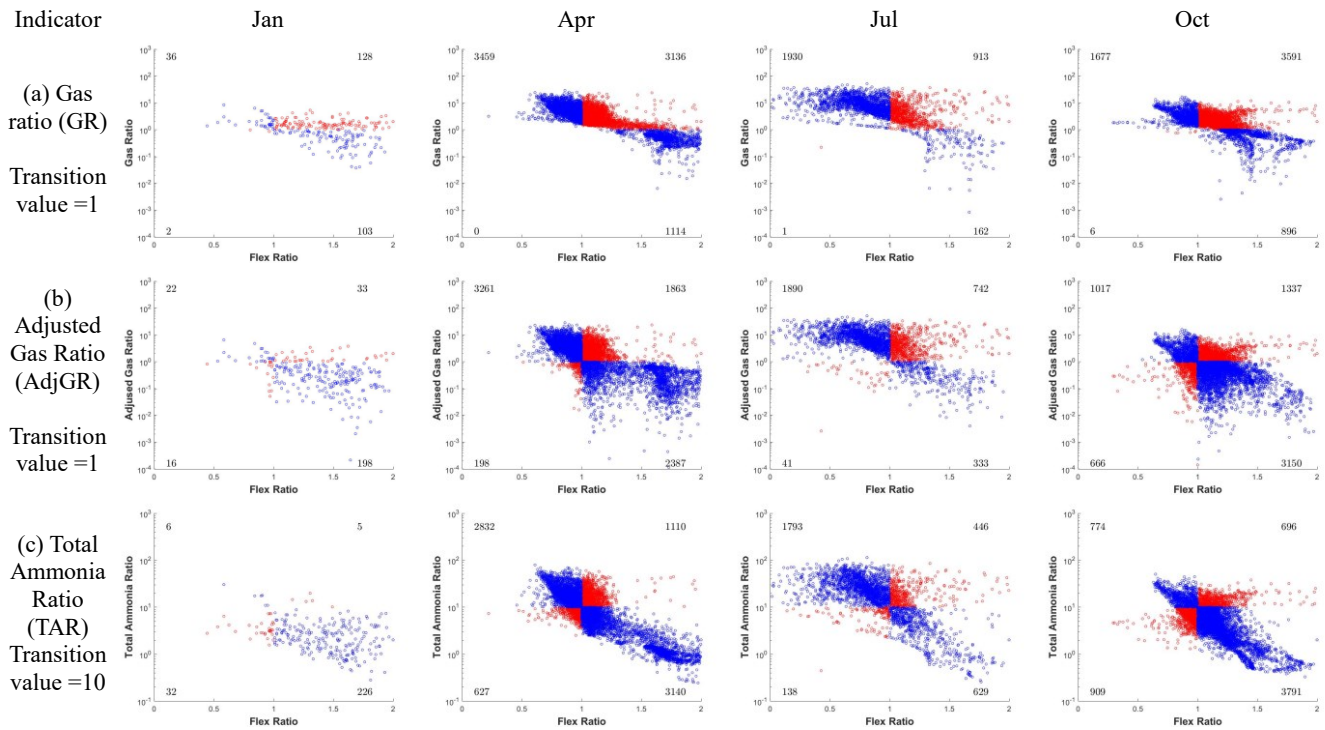

718 **Figure 5.** Performance of observable indicators in predicting PM<sub>2.5</sub> chemistry. The x-axis represents the  
 719 FR values where the transition value is 1, and the y-axis represents the observable indicators. The blue  
 720 dots represent the grids where PM<sub>2.5</sub> chemistry is successfully predicted by the observable indicator; the  
 721 red dots represent the grids where the observable indicator fails to predict PM<sub>2.5</sub> chemistry. The numbers  
 722 in the four corners represent the grid number in each section; the number in January is much lower than  
 723 those in the other months because most grids are located at the NH<sub>3</sub>-poor condition with FR>2 in  
 724 January.

725

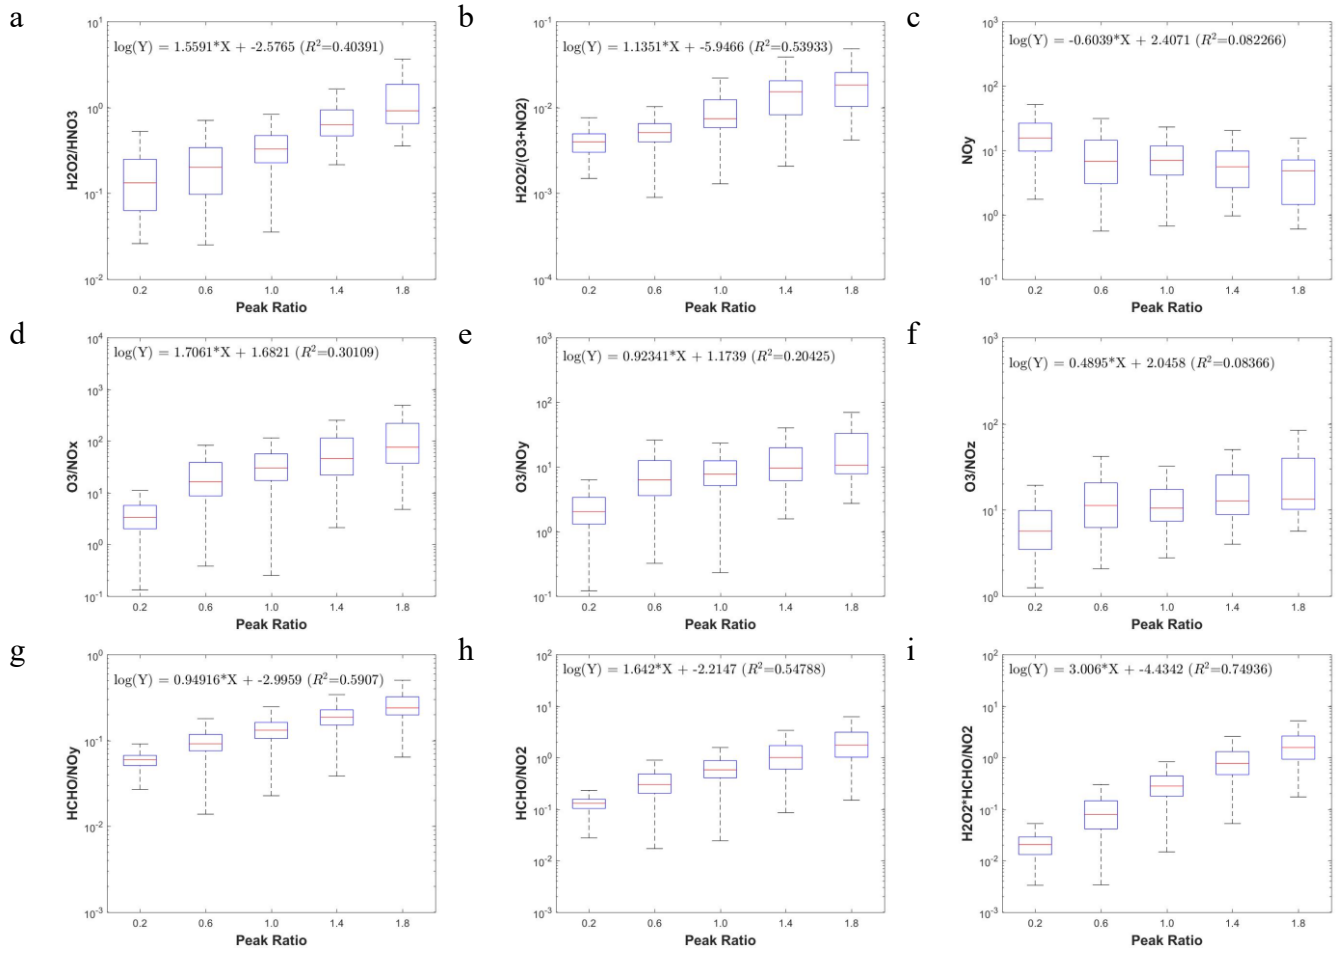

726  
727

**Figure 6.** Development of observable responsive indicators for O<sub>3</sub> chemistry based on log-linear regressions between observable indicators and the PR.



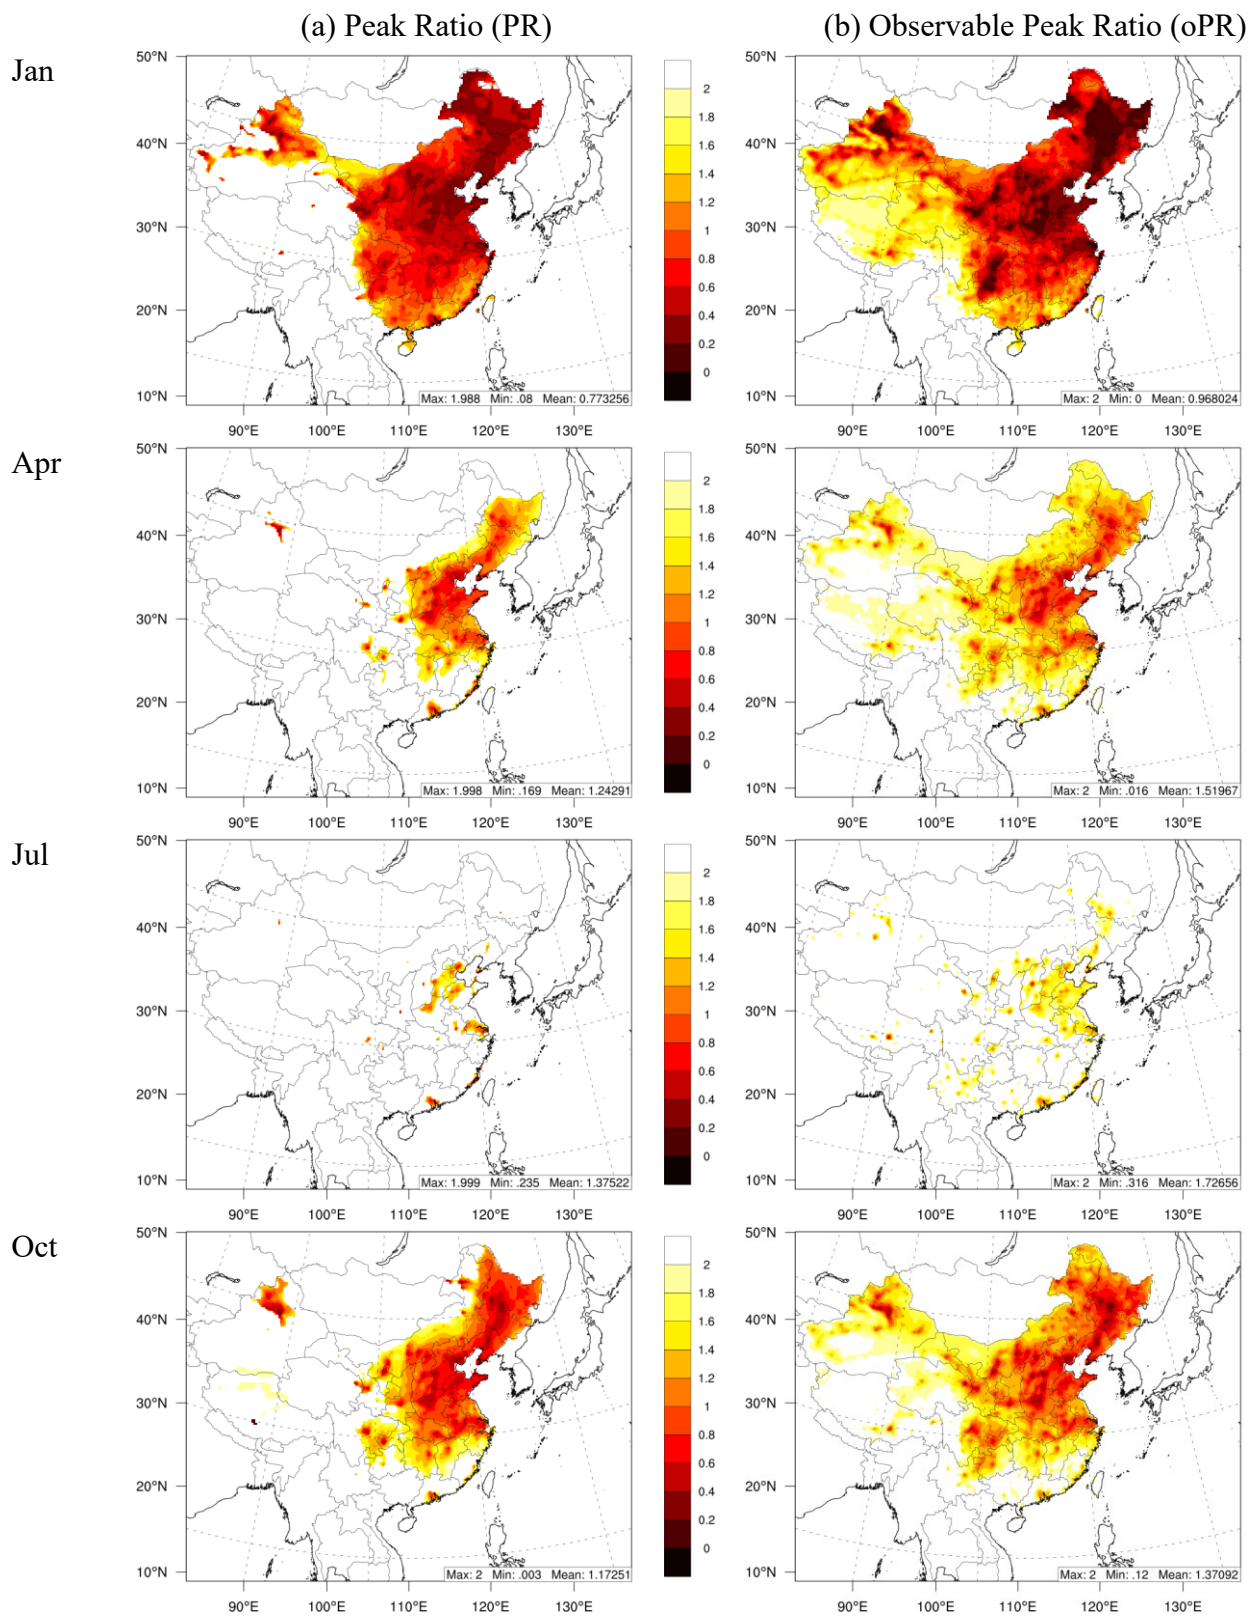

728 **Figure 7.** Comparison of the PR derived from the RSM with that calculated from concentrations for  $O_3$   
 729 chemistry. The oPR was estimated based on  $H_2O_2 \times HCHO/NO_2$ .

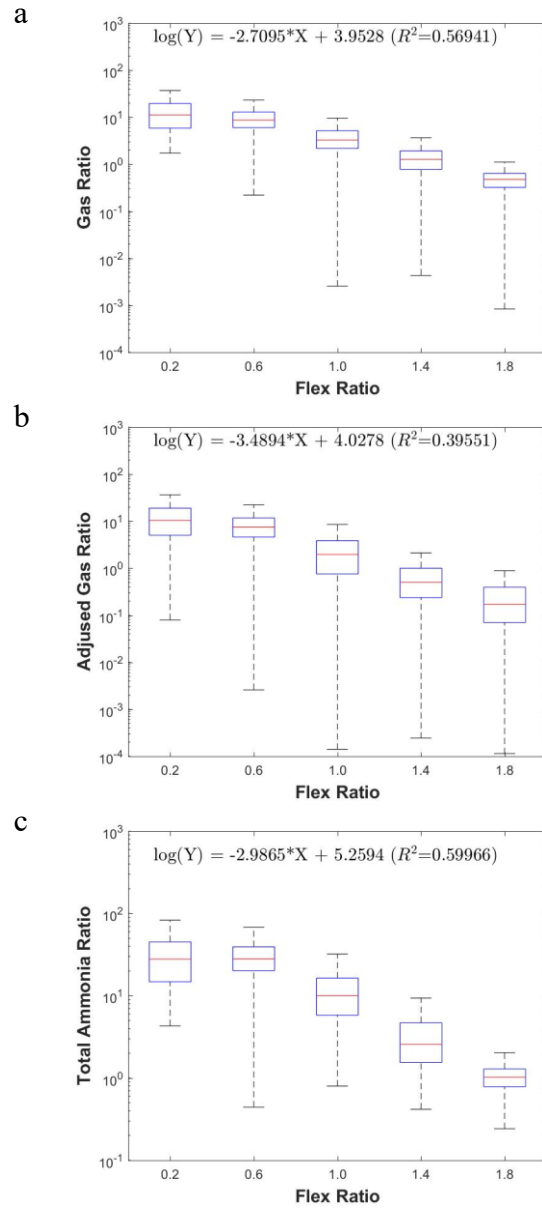

730

731 **Figure 8.** Development of observable responsive indicators for PM<sub>2.5</sub> chemistry based on log-linear  
 732 regressions between observable indicators and the FR

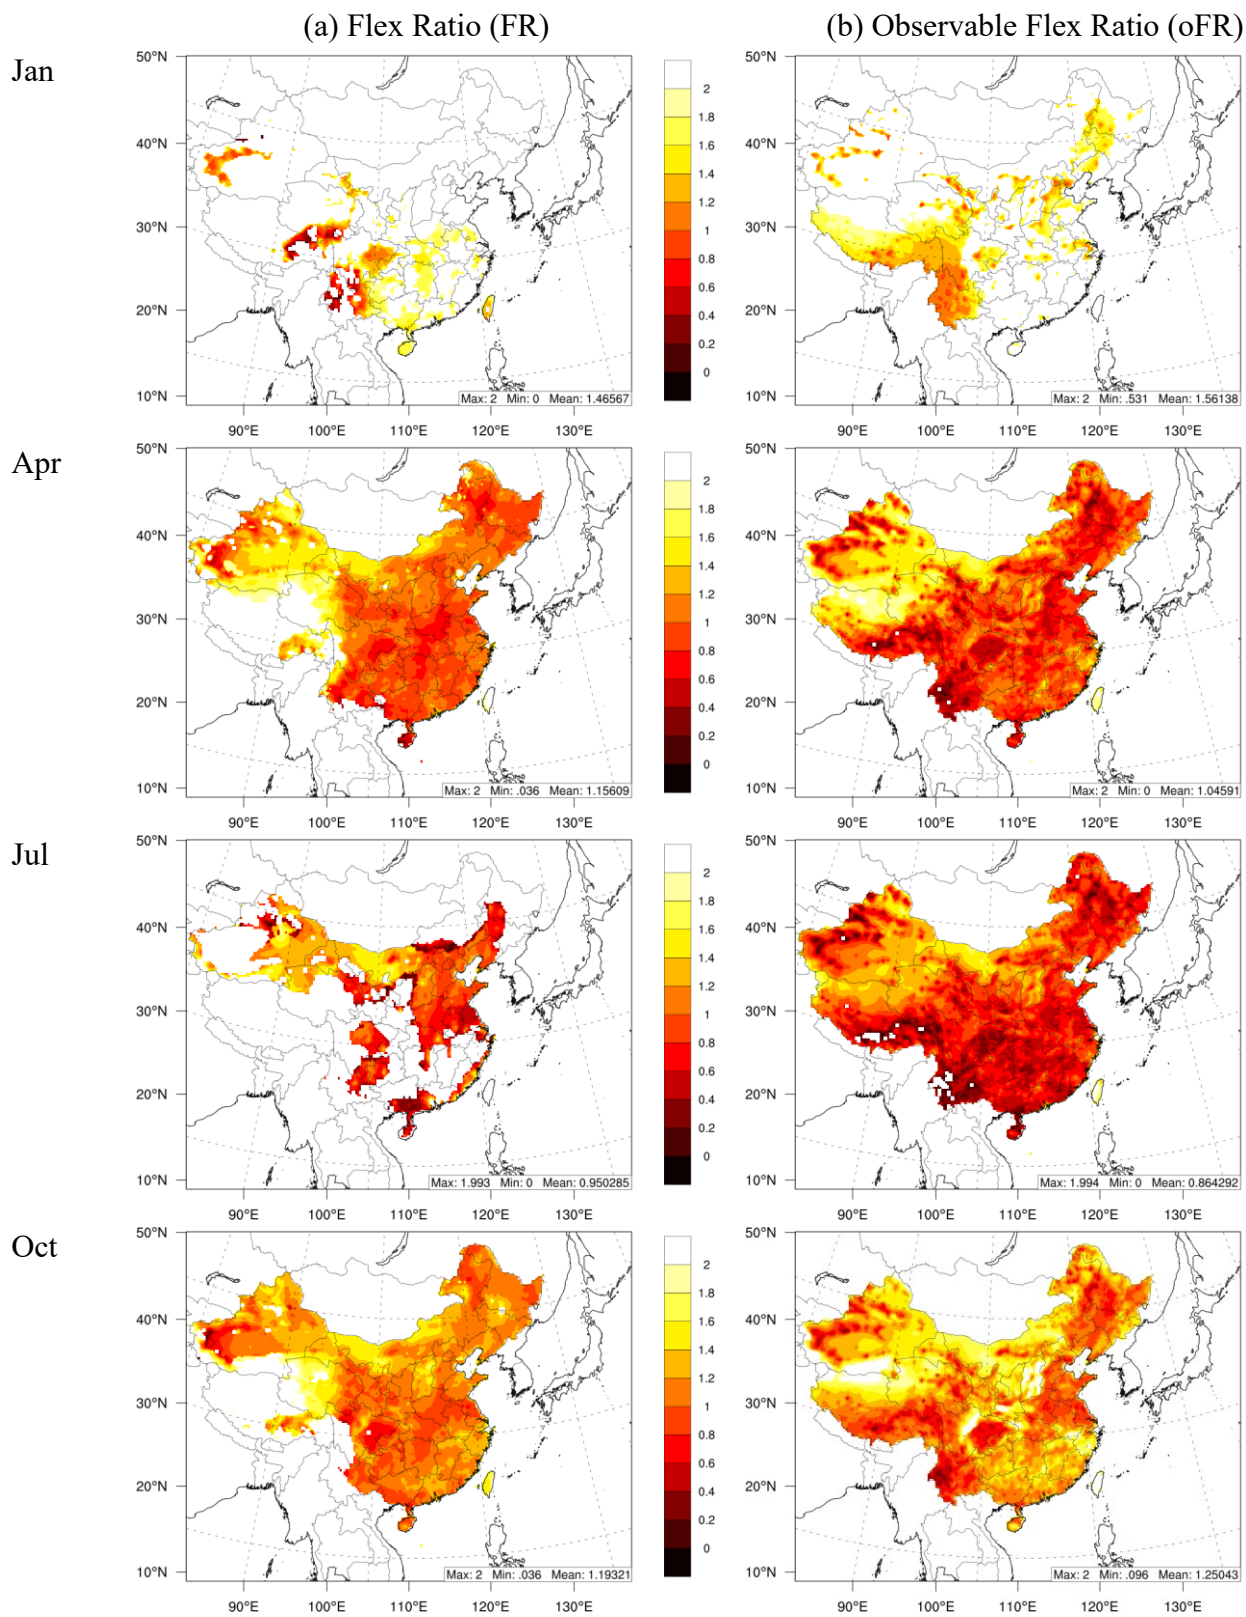

733  
734

**Figure 9.** Comparison of the FR derived from the RSM with that calculated from concentrations for  $PM_{2.5}$  chemistry. The oFR was estimated based on TAR.



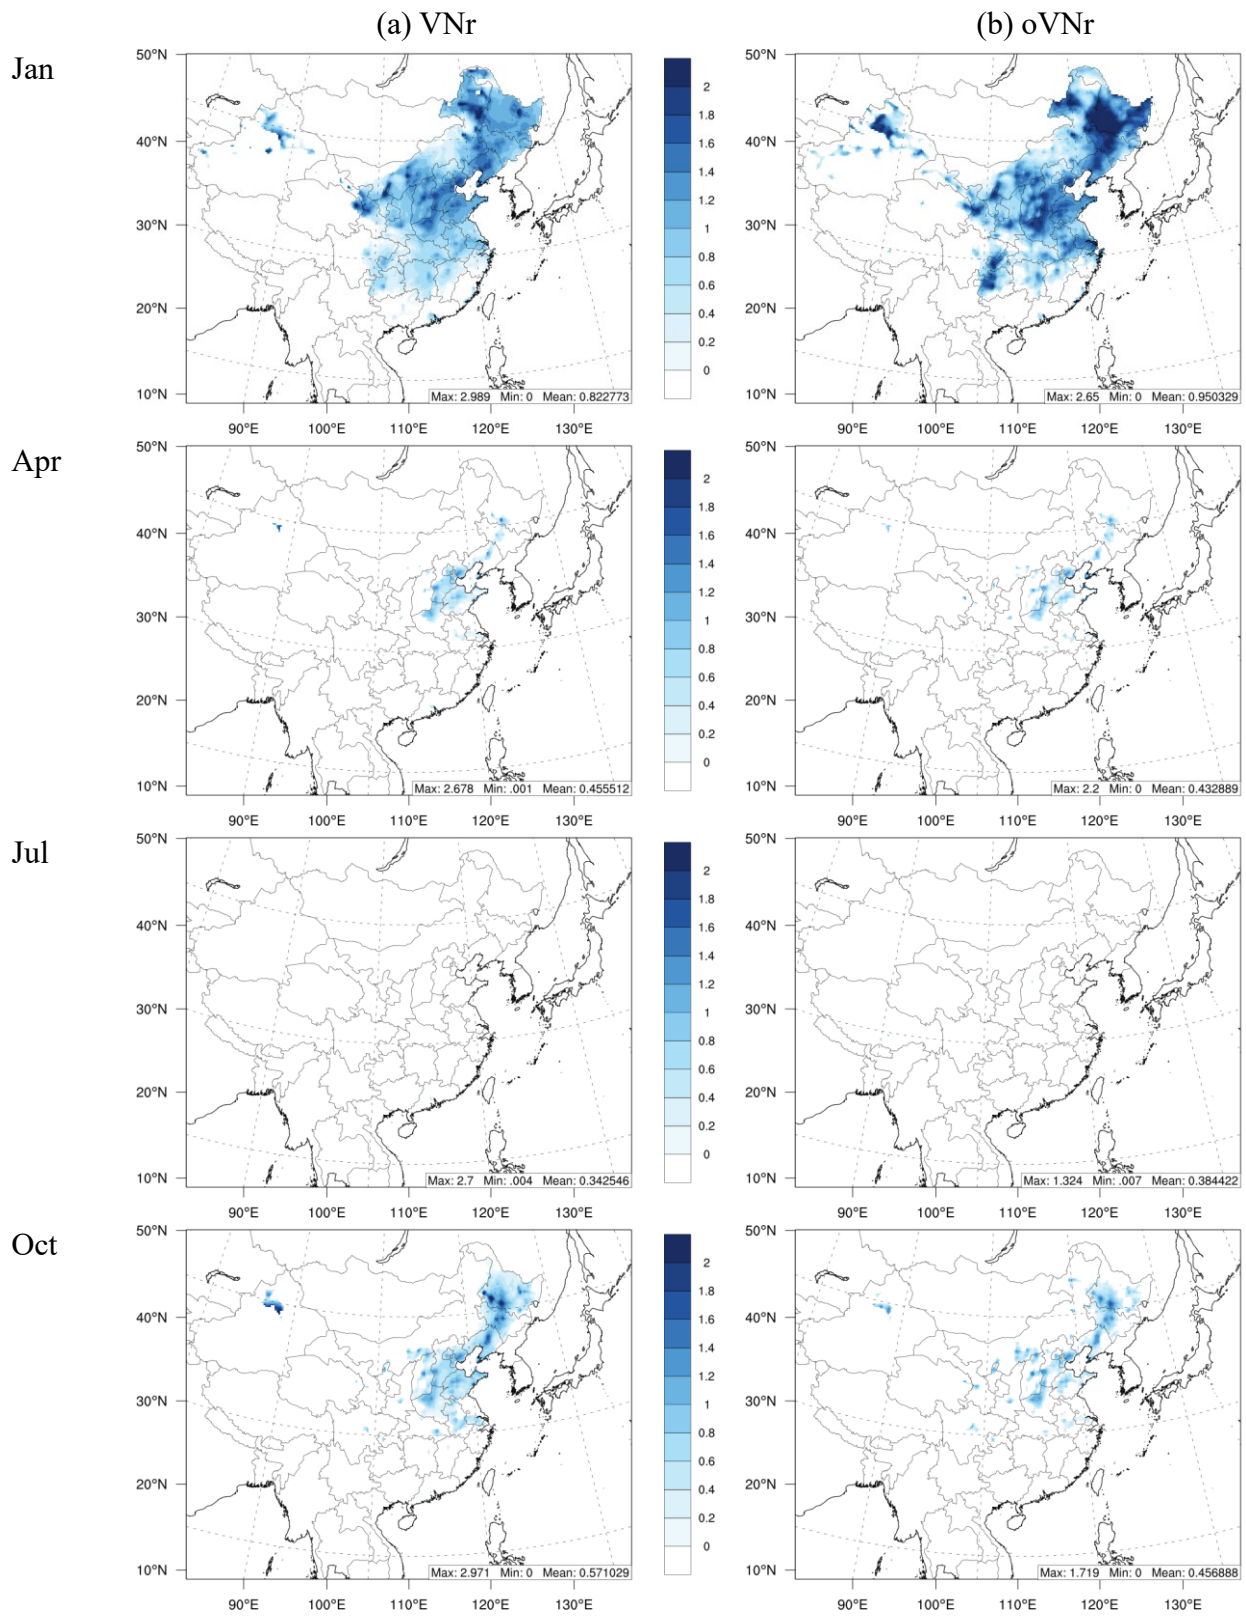

Figure 10. Comparison of VNr with oVNr.

735

736

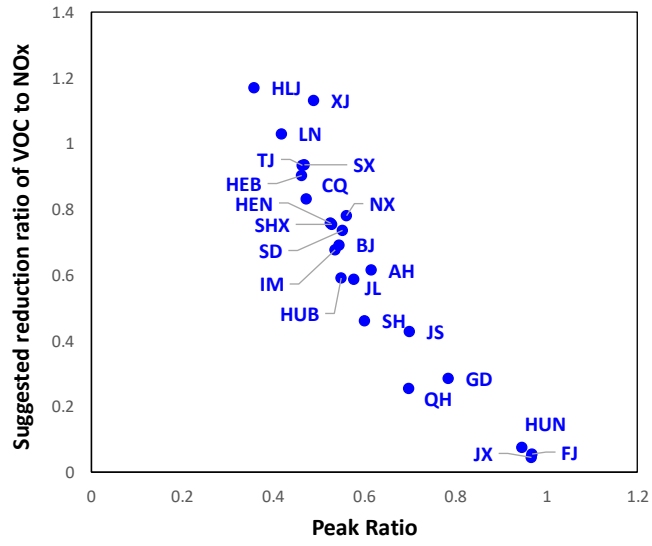

737

738

**Figure 11.** Comparison of the annual-averaged PR with VNr in each province in China

739

740

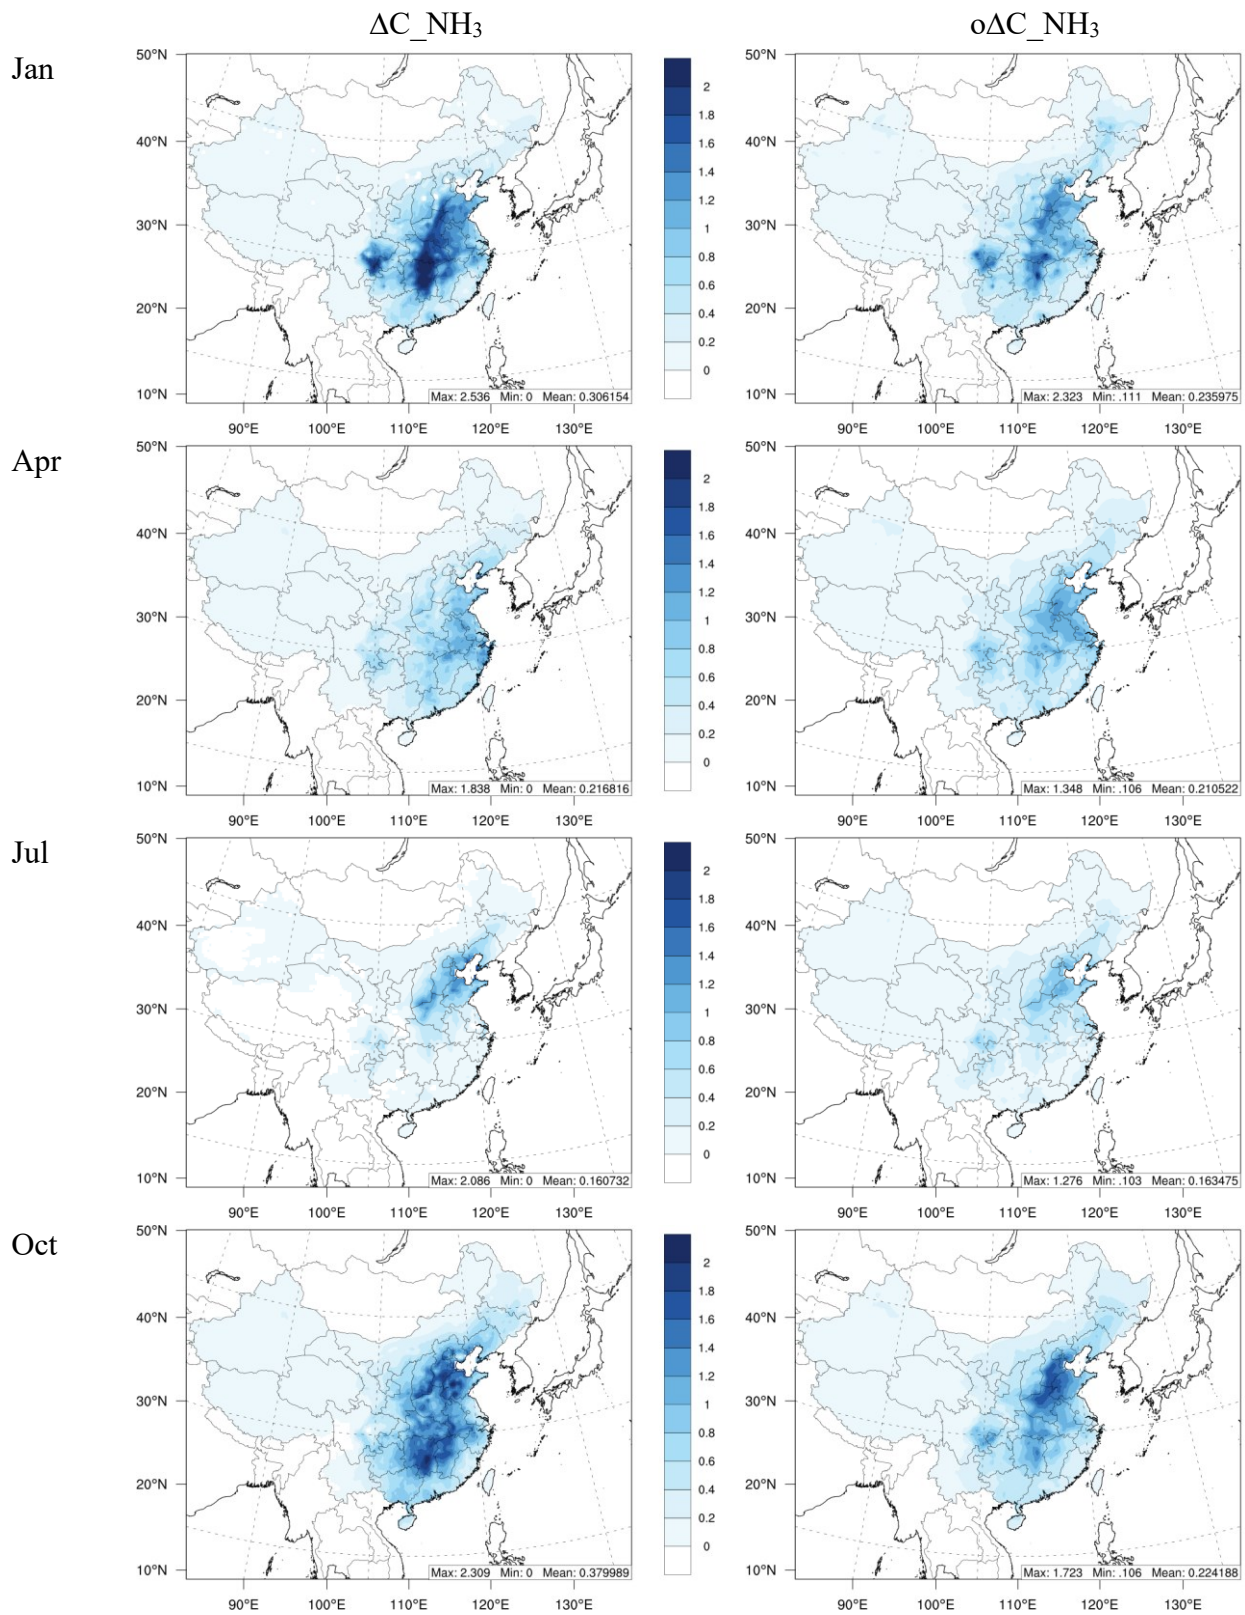

741  
742

**Figure 12.** Comparison of the benefit in reducing  $PM_{2.5}$  from simultaneous  $NH_3$  reduction ( $\Delta C_{NH_3}$ ) with that calculated from concentrations ( $o\Delta C_{NH_3}$ )

743

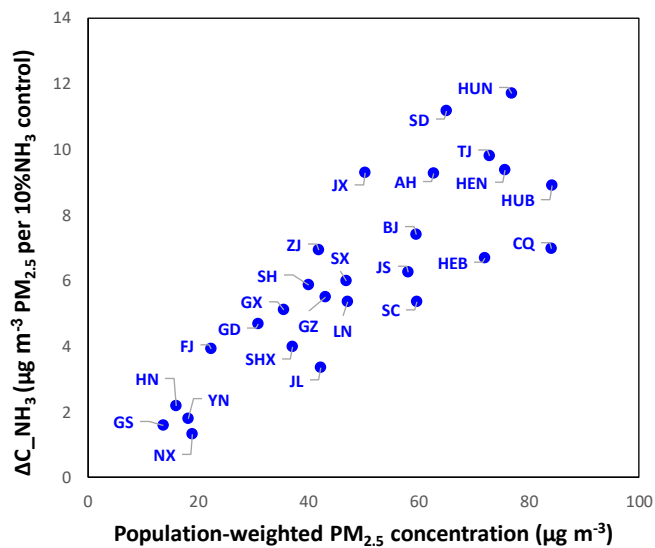

744

745 **Figure 13.** Comparison of annual-averaged benefit in reducing PM<sub>2.5</sub> from simultaneous NH<sub>3</sub> reduction  
746 (ΔC\_NH<sub>3</sub>) and population-weighted PM<sub>2.5</sub> concentration in each province in China

747

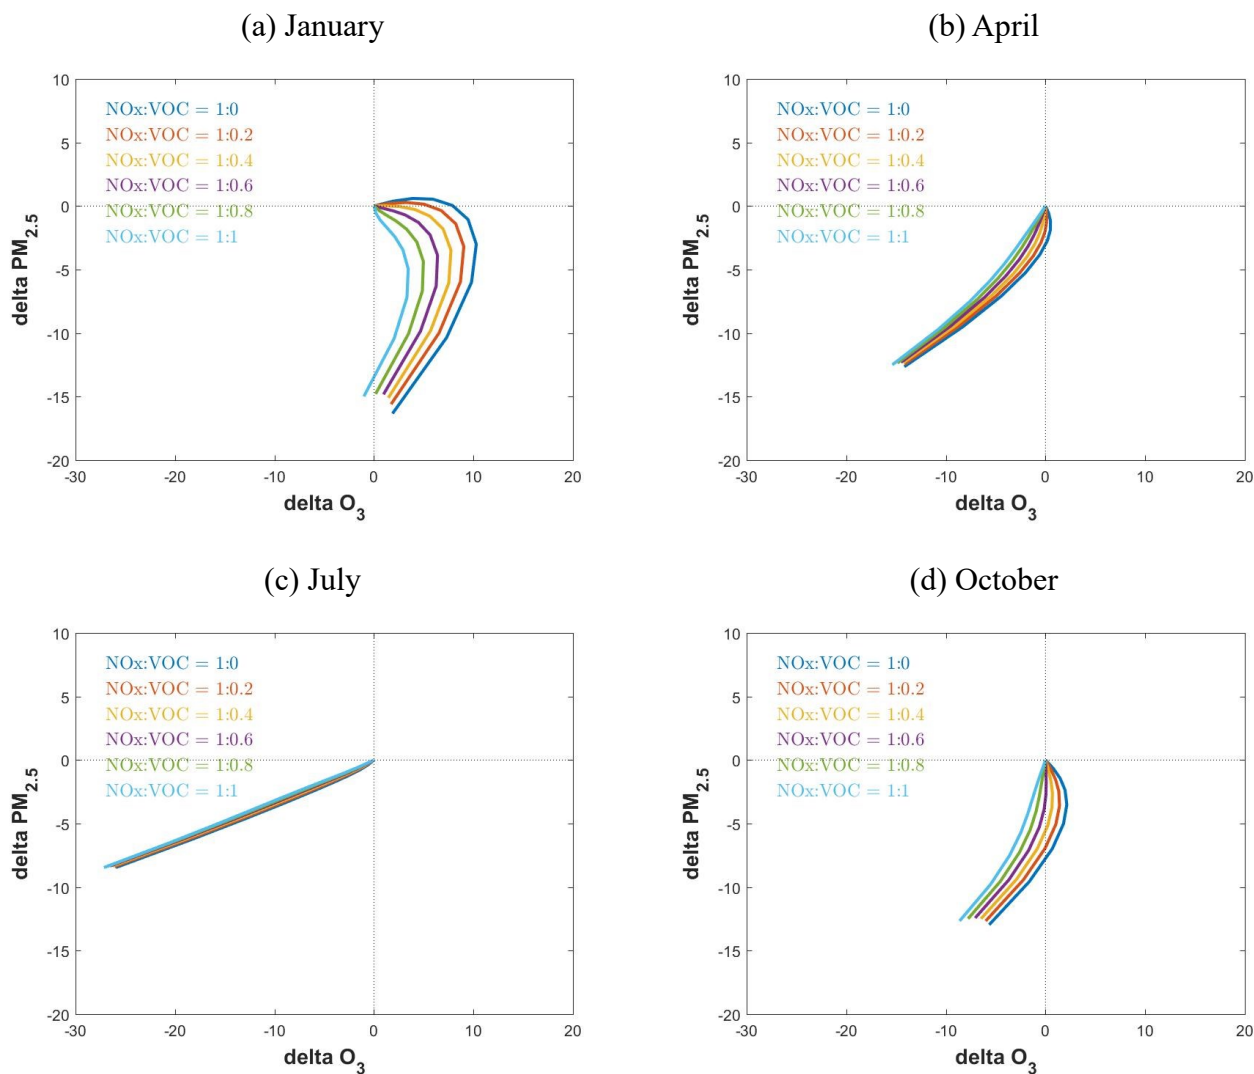

748 **Figure 14.** Control effectiveness with different NO<sub>x</sub> and VOC ratios in reducing population-weighted  
 749 PM<sub>2.5</sub> and O<sub>3</sub> concentrations (in μg m<sup>-3</sup>) in China (NO<sub>x</sub> is from no control to 80 % reduction)
